# Supplementary material for: Impact of anthropometry training and feasibility of 3D imaging on anthropometry data quality among children under five years in a postmortem setting
Source: PubMed Central journal article supplement (PMC10538800; doi:10.1371/journal.pone.0292046), 2023-09-28
Supplement: pone.0292046.s007.pdf [file pone.0292046.s007.pdf]

# PLOS ONE

## Impact of anthropometry training and feasibility of 3D imaging on anthropometry data quality among children under five years in a postmortem setting

--Manuscript Draft--

|                              |                                                                                                                                                                                                                                                                                                                                                                                                                                                                                                                                                                                                                                                                                                                                                                                                                                                                                                                                                                                                                                                                                                                                                                                                                                                                                                                                                                                                                                                                                                                                                                                                                                                                                                                                                                                                                                                                                                                                                                                                                                                                                                                                                                                        |
|------------------------------|----------------------------------------------------------------------------------------------------------------------------------------------------------------------------------------------------------------------------------------------------------------------------------------------------------------------------------------------------------------------------------------------------------------------------------------------------------------------------------------------------------------------------------------------------------------------------------------------------------------------------------------------------------------------------------------------------------------------------------------------------------------------------------------------------------------------------------------------------------------------------------------------------------------------------------------------------------------------------------------------------------------------------------------------------------------------------------------------------------------------------------------------------------------------------------------------------------------------------------------------------------------------------------------------------------------------------------------------------------------------------------------------------------------------------------------------------------------------------------------------------------------------------------------------------------------------------------------------------------------------------------------------------------------------------------------------------------------------------------------------------------------------------------------------------------------------------------------------------------------------------------------------------------------------------------------------------------------------------------------------------------------------------------------------------------------------------------------------------------------------------------------------------------------------------------------|
| <b>Manuscript Number:</b>    | PONE-D-23-01635R1                                                                                                                                                                                                                                                                                                                                                                                                                                                                                                                                                                                                                                                                                                                                                                                                                                                                                                                                                                                                                                                                                                                                                                                                                                                                                                                                                                                                                                                                                                                                                                                                                                                                                                                                                                                                                                                                                                                                                                                                                                                                                                                                                                      |
| <b>Article Type:</b>         | Research Article                                                                                                                                                                                                                                                                                                                                                                                                                                                                                                                                                                                                                                                                                                                                                                                                                                                                                                                                                                                                                                                                                                                                                                                                                                                                                                                                                                                                                                                                                                                                                                                                                                                                                                                                                                                                                                                                                                                                                                                                                                                                                                                                                                       |
| <b>Full Title:</b>           | Impact of anthropometry training and feasibility of 3D imaging on anthropometry data quality among children under five years in a postmortem setting                                                                                                                                                                                                                                                                                                                                                                                                                                                                                                                                                                                                                                                                                                                                                                                                                                                                                                                                                                                                                                                                                                                                                                                                                                                                                                                                                                                                                                                                                                                                                                                                                                                                                                                                                                                                                                                                                                                                                                                                                                   |
| <b>Short Title:</b>          | Anthropometry in the postmortem setting                                                                                                                                                                                                                                                                                                                                                                                                                                                                                                                                                                                                                                                                                                                                                                                                                                                                                                                                                                                                                                                                                                                                                                                                                                                                                                                                                                                                                                                                                                                                                                                                                                                                                                                                                                                                                                                                                                                                                                                                                                                                                                                                                |
| <b>Corresponding Author:</b> | Parminder Suchdev<br>Emory University School of Medicine<br>Atlanta, Georgia UNITED STATES                                                                                                                                                                                                                                                                                                                                                                                                                                                                                                                                                                                                                                                                                                                                                                                                                                                                                                                                                                                                                                                                                                                                                                                                                                                                                                                                                                                                                                                                                                                                                                                                                                                                                                                                                                                                                                                                                                                                                                                                                                                                                             |
| <b>Keywords:</b>             | Nutrition, Anthropometry, Child mortality                                                                                                                                                                                                                                                                                                                                                                                                                                                                                                                                                                                                                                                                                                                                                                                                                                                                                                                                                                                                                                                                                                                                                                                                                                                                                                                                                                                                                                                                                                                                                                                                                                                                                                                                                                                                                                                                                                                                                                                                                                                                                                                                              |
| <b>Abstract:</b>             | <p><b>BACKGROUND:</b> The Child Health and Mortality Prevention Surveillance Network (CHAMPS) identifies causes of under-5 mortality in high mortality countries.</p> <p><b>OBJECTIVE:</b> To address challenges in postmortem nutritional assessment, we evaluated the impact of anthropometry training and the feasibility of 3D imaging on data quality within the CHAMPS Kenya site.</p> <p><b>DESIGN:</b> Staff were trained using World Health Organization (WHO)-recommended manual anthropometry equipment and novel 3D imaging methods to collect postmortem measurements. Following training, 76 deceased children were measured in duplicate and were compared to measurements of 75 pre-training deceased children. Outcomes included measures of data quality (standard deviations of anthropometric indices and digit preference scores (DPS)), precision (absolute and relative technical errors of measurement, TEMs or rTEMs), and accuracy (Bland-Altman plots). WHO growth standards were used to produce anthropometric indices. Post-training surveys and in-depth interviews collected qualitative feedback on measurer experience with performing manual anthropometry and ease of using 3D imaging software.</p> <p><b>RESULTS:</b> Manual anthropometry data quality improved after training, as indicated by DPS. Standard deviations of anthropometric indices exceeded limits for high data quality when using the WHO growth standards. Reliability of measurements post-training was high as indicated by rTEMs below 1.5%. 3D imaging was highly correlated with manual measurements; however, on average 3D scans overestimated length and head circumference by 1.61 cm and 2.27 cm, respectively. Site staff preferred manual anthropometry to 3D imaging, as the imaging technology required adequate lighting and additional considerations when performing the measurements.</p> <p><b>CONCLUSIONS:</b> Manual anthropometry was feasible and reliable postmortem in the presence of rigor mortis. 3D imaging may be an accurate alternative to manual anthropometry, but technology adjustments are needed to ensure accuracy and usability.</p> |
| <b>Order of Authors:</b>     | <p>Priya Mehta Gupta, MPH</p> <p>Kasthuri Sivalogan</p> <p>Richard Oliech</p> <p>Eugene Alexander</p> <p>Jamie Klein</p> <p>O.Yaw Addo</p> <p>Dickson Gethi</p> <p>Victor Akelo</p> <p>Dianna Blau</p> <p>Parminder Suchdev</p>                                                                                                                                                                                                                                                                                                                                                                                                                                                                                                                                                                                                                                                                                                                                                                                                                                                                                                                                                                                                                                                                                                                                                                                                                                                                                                                                                                                                                                                                                                                                                                                                                                                                                                                                                                                                                                                                                                                                                        |

|                                                                                                                                                                                                                                                                                                                                                                                                                                                                                                                                                                                                                                                                                                                                                                                                                                                                                                                                                                                                                                                                                                                                                                                                                                                                                                                                                                                     |                                                                                                                                                                                                                                                                                                                                                                                                                                                                                                                                                                                        |
|-------------------------------------------------------------------------------------------------------------------------------------------------------------------------------------------------------------------------------------------------------------------------------------------------------------------------------------------------------------------------------------------------------------------------------------------------------------------------------------------------------------------------------------------------------------------------------------------------------------------------------------------------------------------------------------------------------------------------------------------------------------------------------------------------------------------------------------------------------------------------------------------------------------------------------------------------------------------------------------------------------------------------------------------------------------------------------------------------------------------------------------------------------------------------------------------------------------------------------------------------------------------------------------------------------------------------------------------------------------------------------------|----------------------------------------------------------------------------------------------------------------------------------------------------------------------------------------------------------------------------------------------------------------------------------------------------------------------------------------------------------------------------------------------------------------------------------------------------------------------------------------------------------------------------------------------------------------------------------------|
| <b>Response to Reviewers:</b>                                                                                                                                                                                                                                                                                                                                                                                                                                                                                                                                                                                                                                                                                                                                                                                                                                                                                                                                                                                                                                                                                                                                                                                                                                                                                                                                                       | Full response to editor and reviewer comments has been uploaded.                                                                                                                                                                                                                                                                                                                                                                                                                                                                                                                       |
| <b>Additional Information:</b>                                                                                                                                                                                                                                                                                                                                                                                                                                                                                                                                                                                                                                                                                                                                                                                                                                                                                                                                                                                                                                                                                                                                                                                                                                                                                                                                                      |                                                                                                                                                                                                                                                                                                                                                                                                                                                                                                                                                                                        |
| <b>Question</b>                                                                                                                                                                                                                                                                                                                                                                                                                                                                                                                                                                                                                                                                                                                                                                                                                                                                                                                                                                                                                                                                                                                                                                                                                                                                                                                                                                     | <b>Response</b>                                                                                                                                                                                                                                                                                                                                                                                                                                                                                                                                                                        |
| <p><b>Financial Disclosure</b></p> <p>Enter a financial disclosure statement that describes the sources of funding for the work included in this submission. Review the <a href="#">submission guidelines</a> for detailed requirements. View published research articles from <a href="#">PLOS ONE</a> for specific examples.</p> <p>This statement is required for submission and <b>will appear in the published article</b> if the submission is accepted. Please make sure it is accurate.</p> <p><b>Unfunded studies</b><br/>Enter: <i>The author(s) received no specific funding for this work.</i></p> <p><b>Funded studies</b><br/>Enter a statement with the following details:</p> <ul style="list-style-type: none"> <li>• Initials of the authors who received each award</li> <li>• Grant numbers awarded to each author</li> <li>• The full name of each funder</li> <li>• URL of each funder website</li> <li>• Did the sponsors or funders play any role in the study design, data collection and analysis, decision to publish, or preparation of the manuscript?</li> <li>• <b>NO</b> - Include this sentence at the end of your statement: <i>The funders had no role in study design, data collection and analysis, decision to publish, or preparation of the manuscript.</i></li> <li>• <b>YES</b> - Specify the role(s) played.</li> </ul> <p>* typeset</p> | <p>Sources of Support: This work was funded by grant OPP1126780 from the Bill &amp; Melinda Gates Foundation.</p> <p>The funder participated in discussions of study design and data collection. They did not participate in the conduct of the study; the management, analysis, or interpretation of the data; preparation, review, or approval of the manuscript; or decision to submit the manuscript for publication.</p>                                                                                                                                                          |
| <p><b>Competing Interests</b></p> <p>Use the instructions below to enter a competing interest statement for this submission. On behalf of all authors, disclose any <a href="#">competing interests</a> that could be perceived to bias this work—acknowledging all financial support and any other relevant financial or non-financial competing interests.</p>                                                                                                                                                                                                                                                                                                                                                                                                                                                                                                                                                                                                                                                                                                                                                                                                                                                                                                                                                                                                                    | <p>I have read the journal's policy and the authors of this manuscript have the following competing interests: Eugene Alexander holds an ownership position in Body Surface Translations and therefore has a financial interest in the success of the 3D testing device described in this study. Data were blinded and not shared with Mr. Alexander until completion of draft manuscript.</p> <p>This does not alter our adherence to PLOS ONE policies on sharing data and materials.</p> <p>Additional disclosure: The findings and conclusions in this report are those of the</p> |

authors and do not necessarily represent the official position of the Centers for Disease Control and Prevention.

This statement is **required** for submission and **will appear in the published article** if the submission is accepted. Please make sure it is accurate and that any funding sources listed in your Funding Information later in the submission form are also declared in your Financial Disclosure statement.

View published research articles from [PLOS ONE](#) for specific examples.

**NO authors have competing interests**

Enter: *The authors have declared that no competing interests exist.*

**Authors with competing interests**

Enter competing interest details beginning with this statement:

*I have read the journal's policy and the authors of this manuscript have the following competing interests: [insert competing interests here]*

\* typeset

**Ethics Statement**

Enter an ethics statement for this submission. This statement is required if the study involved:

- Human participants
- Human specimens or tissue
- Vertebrate animals or cephalopods
- Vertebrate embryos or tissues
- Field research

Write "N/A" if the submission does not require an ethics statement.

General guidance is provided below. Consult the [submission guidelines](#) for detailed instructions. **Make sure that all**

Ethics committees or institutional review boards overseeing investigators at each site and at Emory University (Emory IRB#: 00091706) approved the generic and site-specific protocols, as appropriate. The Centers for Disease Control and Prevention formally relied on the Emory University IRB for review of the overall protocol and on appropriate site ethical review committees where CDC staff were directly engaged at the site. Details of ethical protocols are available at <https://champshealth.org/protocols/>.

information entered here is included in the Methods section of the manuscript.

**Format for specific study types**

**Human Subject Research (involving human participants and/or tissue)**

- Give the name of the institutional review board or ethics committee that approved the study
- Include the approval number and/or a statement indicating approval of this research
- Indicate the form of consent obtained (written/oral) or the reason that consent was not obtained (e.g. the data were analyzed anonymously)

**Animal Research (involving vertebrate animals, embryos or tissues)**

- Provide the name of the Institutional Animal Care and Use Committee (IACUC) or other relevant ethics board that reviewed the study protocol, and indicate whether they approved this research or granted a formal waiver of ethical approval
- Include an approval number if one was obtained
- If the study involved *non-human primates*, add *additional details* about animal welfare and steps taken to ameliorate suffering
- If anesthesia, euthanasia, or any kind of animal sacrifice is part of the study, include briefly which substances and/or methods were applied

**Field Research**

Include the following details if this study involves the collection of plant, animal, or other materials from a natural setting:

- Field permit number
- Name of the institution or relevant body that granted permission

**Data Availability**

Authors are required to make all data underlying the findings described fully available, without restriction, and from the time of publication. PLOS allows rare exceptions to address legal and ethical

Yes - all data are fully available without restriction

concerns. See the [PLOS Data Policy](#) and [FAQ](#) for detailed information.

A Data Availability Statement describing where the data can be found is required at submission. Your answers to this question constitute the Data Availability Statement and **will be published in the article**, if accepted.

**Important:** Stating 'data available on request from the author' is not sufficient. If your data are only available upon request, select 'No' for the first question and explain your exceptional situation in the text box.

Do the authors confirm that all data underlying the findings described in their manuscript are fully available without restriction?

**Describe where the data may be found in full sentences. If you are copying our sample text, replace any instances of XXX with the appropriate details.**

- If the data are **held or will be held in a public repository**, include URLs, accession numbers or DOIs. If this information will only be available after acceptance, indicate this by ticking the box below. For example: *All XXX files are available from the XXX database (accession number(s) XXX, XXX).*
- If the data are all contained **within the manuscript and/or Supporting Information files**, enter the following: *All relevant data are within the manuscript and its Supporting Information files.*
- If neither of these applies but you are able to provide **details of access elsewhere**, with or without limitations, please do so. For example:

*Data cannot be shared publicly because of [XXX]. Data are available from the XXX Institutional Data Access / Ethics Committee (contact via XXX) for researchers who meet the criteria for access to confidential data.*

The minimal anonymized data set necessary to replicate our study findings has been included as Supporting Information

|                                                                                                                                                                                                                                                                                                                                                        |                                                                                                                                                                                  |
|--------------------------------------------------------------------------------------------------------------------------------------------------------------------------------------------------------------------------------------------------------------------------------------------------------------------------------------------------------|----------------------------------------------------------------------------------------------------------------------------------------------------------------------------------|
| <p><i>The data underlying the results presented in the study are available from (include the name of the third party and contact information or URL).</i></p> <ul style="list-style-type: none"><li>• This text is appropriate if the data are owned by a third party and authors do not have permission to share the data.</li></ul> <p>* typeset</p> |                                                                                                                                                                                  |
| Additional data availability information:                                                                                                                                                                                                                                                                                                              | Tick here if the URLs/accession numbers/DOIs will be available only after acceptance of the manuscript for publication so that we can ensure their inclusion before publication. |

1 **Impact of anthropometry training and feasibility of 3D imaging on anthropometry data**  
2 **quality among children under five years in a postmortem setting**

3  
4 Priya M. Gupta<sup>1</sup>, Kasthuri Sivalogan<sup>1</sup>, Richard Oliech<sup>2</sup>, Eugene Alexander<sup>3</sup>, Jamie Klein<sup>4</sup>, O. Yaw.  
5 Addo<sup>1,6</sup>, Dickson Gethi<sup>5</sup>, Victor Akelo<sup>5</sup>, Dianna M. Blau<sup>6</sup>, Parminder S. Suchdev<sup>1,4,6\*</sup>

6  
7 <sup>1</sup>. Nutrition and Health Sciences Program, Laney Graduate School, Emory University, Atlanta,  
8 GA, USA

9 <sup>2</sup>. Kenya Medical Research Institute, Kisumu, Kenya

10 <sup>3</sup>. Body Surface Translations, Inc. (BST), Athens, GA, USA

11 <sup>4</sup>. Emory University School of Medicine, Atlanta, GA, USA

12 <sup>5</sup>. US Centers for Disease Control and Prevention-Kenya, Kisumu and Nairobi, Kenya

13 <sup>6</sup>. US Centers for Disease Control and Prevention, Atlanta, GA, USA

14

15 **Conflicts of interest:**

16 Eugene Alexander holds an ownership position in Body Surface Translations and therefore has a  
17 financial interest in the success of the 3D testing device described in this study. Data were  
18 blinded and not shared with Mr. Alexander until completion of draft manuscript.

19

20 **Additional disclosure:** The findings and conclusions in this report are those of the authors and  
21 do not necessarily represent the official position of the Centers for Disease Control and  
22 Prevention.

23

24 **Data Sharing:** Data described in the manuscript, code book, and analytic code will be made  
25 available upon request pending [e.g., application and approval, payment, other].

26

27 **\*Corresponding Author**

28 Parminder S Suchdev

29 1599 Clifton Rd NE

30 Atlanta, GA 30322

31 psuchde@emory.edu

32

33 **Running Title:** Anthropometry in the postmortem setting

34

35 **Abstract**

36

37 **BACKGROUND:** The Child Health and Mortality Prevention Surveillance Network (CHAMPS)  
38 identifies causes of under-5 mortality in high mortality countries.

39

40 **OBJECTIVE:** To address challenges in postmortem nutritional assessment, we evaluated the  
41 impact of anthropometry training and the feasibility of 3D imaging on data quality within the  
42 CHAMPS Kenya site.

43

44 **DESIGN:** Staff were trained using World Health Organization (WHO)-recommended manual  
45 anthropometry equipment and novel 3D imaging methods to collect postmortem  
46 measurements. Following training, 76 deceased children were measured in duplicate and were  
47 compared to measurements of 75 pre-training deceased children. Outcomes included measures  
48 of data quality (standard deviations of anthropometric indices and digit preference scores  
49 (DPS)), precision (absolute and relative technical errors of measurement, TEMs or rTEMs), and  
50 accuracy (Bland-Altman plots). WHO growth standards were used to produce anthropometric  
51 indices. Post-training surveys and in-depth interviews collected qualitative feedback on  
52 measurer experience with performing manual anthropometry and ease of using 3D imaging  
53 software.

54

55 **RESULTS:** Manual anthropometry data quality improved after training, as indicated by DPS.  
56 Standard deviations of anthropometric indices exceeded limits for high data quality when using  
57 the WHO growth standards. Reliability of measurements post-training was high as indicated by  
58 rTEMs below 1.5%. 3D imaging was highly correlated with manual measurements; however, on  
59 average 3D scans overestimated length and head circumference by 1.61 cm and 2.27 cm,  
60 respectively. Site staff preferred manual anthropometry to 3D imaging, as the imaging  
61 technology required adequate lighting and additional considerations when performing the  
62 measurements.

63 **CONCLUSIONS:** Manual anthropometry was feasible and reliable postmortem in the presence  
64 of rigor mortis. 3D imaging may be an accurate alternative to manual anthropometry, but  
65 technology adjustments are needed to ensure accuracy and usability.

66



## 67 Introduction

68 Malnutrition is estimated to contribute to approximately half of under-5-mortality (U5M) [1-3].  
69 Malnutrition is also a major cause of morbidity as malnutrition plays a critical role in child  
70 neurodevelopment and health across the life course [2-4]. Reliable assessment tools for  
71 malnutrition are essential to reflect individual status, measure biological function, and predict  
72 health outcomes [5-7]. In children, inadequate growth is defined according to anthropometric  
73 measurements (length, weight, head and mid-upper arm circumference) that fall below 2  
74 standard deviations of the normal sex-specific weight-for-length (wasting), length-for-age  
75 (stunting), and weight-for-age (underweight) [7]. Despite the importance of accurate  
76 anthropometry to detect early signs of malnutrition and monitor child growth, health facilities  
77 routinely use non-standardized anthropometric equipment, and as a result, measurements are  
78 often inaccurate [8]. Inaccurate measurements can lead to spurious classification of  
79 malnutrition in both individuals and populations[9].

80 In addition to the challenges of procuring and using standard anthropometric measurement  
81 tools, anthropometric measurements are subject to human error and are particularly difficult to  
82 collect among young children as children are easily distressed, have difficulty staying still, and  
83 may be unable to meet the requirements (i.e. ability to lie down or stand up) for manual  
84 anthropometry [10-12]. Anthropometric measurements are particularly challenging in  
85 hospitalized settings or in medically complex patients due to medical equipment that may  
86 impede taking measurements (e.g., intravenous lines or feeding tubes), severe illness, or  
87 limitations in mobility. These children are also at highest risk of malnutrition [8, 13].  
88 Additionally, qualitative findings from a quality improvement study in a children's hospital  
89 found that, wooden height-length measuring boards (ShorrBoard®, Weigh and Measure, LLC,  
90 Maryland USA) were considered to be *“heavy, cumbersome to assemble, frightening to*  
91 *patients, and required pre-planning and coordination between clinical staff with busy schedules*  
92 *and competing priorities”* [8]. Lastly, in field settings, the weight of the board may impede  
93 transportation and movement within the field and lack of standardization and maintenance of  
94 anthropometric equipment across study sites may contribute to poor data quality and  
95 misclassification [10, 11]. The post-mortem setting is another environment in which manual  
96 anthropometry may be challenging. Morgue capacity, rigor mortis, and edema can impact the  
97 quality and accuracy of measurements [14]. To our knowledge, no research has been  
98 conducted on the feasibility of using gold-standard anthropometric assessment in the  
99 postmortem setting.

100 The Child Health and Mortality Prevention Surveillance (CHAMPS) network is a multi-site  
101 surveillance system which strives to identify and understand the causes of under-5-mortality  
102 (U5M) in seven surveillance sites in sub-Saharan Africa and South Asia through detailed cause  
103 of death attribution with the use of high-quality postmortem anthropometrics, tissue samples,  
104 clinical abstraction, verbal autopsy, and the ability to integrate data from site-specific health  
105 and demographic surveillance systems (HDSS) [15, 16]. A recent analysis of the postmortem  
106 anthropometric data in CHAMPS suggested that nearly 90% of cases 1-59 months had evidence  
107 of undernutrition (stunting, wasting, or underweight) [17]. Given these data, it is possible that

108 malnutrition is directly or indirectly associated with child mortality. However, our  
109 understanding of the relationship between malnutrition and mortality may also be hindered by  
110 poor anthropometric measurement data quality, including digit preference (e.g. measurement  
111 rounding), high percentage of biologically implausible values, and standard deviations for  
112 anthropometric indices that exceed acceptable limits, which may lead to misclassification of  
113 malnutrition [18-20]. These data quality and precision outcomes may be a result of shortages of  
114 standard equipment in CHAMPS sites, lack of training on manual anthropometry, or difficulty in  
115 conducting manual anthropometry in the postmortem setting (rigor mortis, poor lighting in  
116 morgue facilities).

117 Our primary objectives were to determine whether manual anthropometry is feasible in the  
118 postmortem setting and to quantify the impact of training and standard equipment on data  
119 quality. Given the practical challenges of performing manual anthropometry in field and  
120 hospital-based settings, various 3D imaging approaches have also been developed to obtain  
121 anthropometric measurements. An efficacy study conducted at Emory University found that a  
122 3D imaging software was as accurate as gold-standard manual anthropometry among under-5  
123 children in Atlanta-area daycare centers [10]. However, data are also needed to assess 3D  
124 imaging in challenging hospital- or field-based settings. Therefore, our secondary objective was  
125 to assess the validity and acceptability of 3D imaging for anthropometric assessment compared  
126 to gold-standard manual anthropometry.

127  
128

## 129 **Materials and methods**

### 130 **Study site and data collection**

131 This longitudinal quality improvement study took place from October 2018 to September 2019  
132 in the CHAMPS Manyatta, Kenya site located at the Jaramogi Oginga Odinga Teaching and  
133 Referral Hospital (JOTRH). Prior to the training, site staff performed manual anthropometry on  
134 75 deceased children as a routine part of the minimally invasive tissue sampling (MITS) portion  
135 of CHAMPS data collection. The MITS procedure is an abridged postmortem examination  
136 technique that has been validated for cause of death investigation in low-resource settings,  
137 described in detail in an earlier study [21]. Written informed consent was obtained from  
138 families as part of the CHAMPS enrollment procedures. The CHAMPS protocol was approved by  
139 ethics committees in Kenya and at Emory University, Atlanta, GA, USA. Additional information  
140 regarding the ethical, cultural, and scientific considerations specific to inclusivity in global  
141 research is included in the Supporting Information.

142

143 Upon conclusion of pre-training data collection, a senior nutritionist, pediatrician, and  
144 anthropometry expert led and conducted an on-site 1-week training on manual anthropometry  
145 and the 3D imaging scanner for 6 staff. Using materials developed by the CDC, WHO and  
146 UNICEF, the training on manual anthropometry emphasized best practices for accurate manual  
147 measures of length, weight, head circumference (HC) and mid-upper arm circumference  
148 (MUAC) measurements using two trained anthropometrists and standard operating procedures  
149 [22]. Standard equipment in both sites, including wooden height-length measuring boards

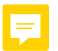

150 (ShorrBoard®, Weigh and Measure, LLC, Maryland USA), digital scales (Rice Lake Weighing  
151 Systems, Inc., Rice Lake, WI), and standard tape measures (Weigh and Measure LLC, Maryland  
152 USA), were used to ensure accurate measurement of recumbent length, weight, HC and MUAC,  
153 respectively. Staff completed an anthropometry standardization exercise using live children to  
154 ensure competence in conducting manual anthropometry. Staff were also trained on proper  
155 use the 3D imaging software using dolls and live children; details on the imaging software are  
156 provided in earlier studies [10, 23, 24]. Briefly, the AutoAnthro system uses an iPad™ tablet,  
157 and a Structure Sensor™ camera attached to the tablet to capture non-personally identifiable  
158 anthropometric scan images of the deceased child. Following the training, two trained  
159 anthropometrists manually collected anthropometric measurements for 76 cases, with two  
160 separate measurements collected per case by different anthropometrists. Additionally, 3D  
161 scans were completed in duplicate for each anthropometrist, for a total of 4 scans per case.  
162 During data processing, after the completion of data collection, it was identified that the  
163 AutoAnthro software settings had been inadvertently altered for a significant number of cases,  
164 resulting in a final sample size of 23 cases.  
165

## 166 **Outcomes of interest**

167 Key outcomes of interest included measures of data quality, precision, and accuracy. Data  
168 quality outcomes indicators included digit preference and standard deviations (SD) of  
169 anthropometric indices. Digit preference is the examination of a uniform distribution of  
170 terminal digits. We also calculated a digit preference score (DPS) to evaluate digit preference  
171 [25]. The DPS ranges from 0 to 100. Scores are low in instances of high agreement with the  
172 ideal of non-preference of the terminal digits, whereas DPS rises as the measures deviate from  
173 a uniform distribution across the terminal digits 0 through 9. In previous studies, a DPS cutoff  
174 above 20 was used to define the presence of digit preference [26, 27]. We thus used  $DPS < 20$  as  
175 acceptable, and  $DPS \geq 20$  to indicate digit preference was problematic. Previous studies have  
176 suggested acceptable standard deviation ranges specifically for data quality among living  
177 children [28]. These include 1.10-1.30, 1.00-1.20, 0.85-1.10 for length-for-age (HAZ), weight-for-  
178 age (WAZ), and weight-for-length (WLZ) z-scores, respectively. Z-scores for anthropometric  
179 indices were produced using the WHO Multicentre Growth Reference Study anthro R package  
180 [29].  
181

182 Technical errors of measurement (TEM) were used to assess measurement precision. Following  
183 the training, the site staff performed manual anthropometry in duplicate. It is important to  
184 note that this differs from the data collection strategy pre-training in which a single set of  
185 measures were taken. As a result, we were only able to calculate TEMs for the data post-  
186 training in both sites. TEM express the error margin in anthropometry; they are unitless and  
187 allow comparison of errors across measures (e.g., weight, height etc.). Absolute TEMs were  
188 calculated using the formula outlined in Equation 1 (**Table 4**). Absolute TEMs can also be  
189 transformed into relative TEMs, which express the error as a percentage corresponding to the  
190 total average. Relative TEMs (rTEM) were calculated using the formula outlined in Equation 2  
191 (**Table 4**). We used a cutoff of  $< 1.5\%$  rTEM to indicate a skillful anthropometrist [25].  
192

193 Finally, Bland Altman plots were used to assess the accuracy of the 3D imaging software relative  
194 to manual anthropometry following the training and were quantified in the unit of the measure  
195 (cm or kg). Spearman correlation coefficients examined the strength of the relationship  
196 between scans and manual measures.

197  
198 Following the study, a short survey was sent to the 6 study participants. The survey collected  
199 information on whether the participants believed training on manual anthropometry improved  
200 the accuracy of the measurements, whether 3D imaging reduced the time to measure, and  
201 asked about the participants preference in measuring using manual anthropometry or the 3D  
202 imaging technology. We also conducted a 60-minute in-depth interview with the single lead site   
203 technician to collect qualitative feedback on the team’s experience with performing manual  
204 anthropometry and ease of using the 3D imaging software. All analyses were conducted in R  
205 statistical software [30]. Statistical tests were two-sided and evaluated using an alpha level  
206 equal to 0.05. Pearson’s Chi-Square tests (categorical variables) or t-tests (continuous variables)  
207 were used to evaluate differences between pre-intervention and post-interventions groups.  
208 The qualitative data were utilized to improve the implementation of manual anthropometric  
209 measurements across the CHAMPS Network.

210  
211 We also conducted a small study in collaboration with the Pediatrics and Pathology  
212 departments at Children’s Healthcare of Atlanta, Egleston Hospital (CHOA). The goal was to  
213 evaluate whether manual anthropometry and 3D imaging performed consistently in a high-  
214 resource setting with adequate lighting and internet. The same training, detailed above, was  
215 used, and pathology staff notified the anthropometrists upon arrival of a case at the morgue.  
216 Manual anthropometry was to be performed prior to the start of the diagnostic autopsy.  
217 Significant challenges arose during data collection, including identification of eligible cases and  
218 timing to conduct anthropometry before the start of the diagnostic autopsy. Despite best  
219 efforts to coordinate between the study team and CHOA team, the study resulted in a limited  
220 sample size of 3 cases; thus, our results will focus on the Kenya site. .

221

## 222 Results

223  Sample characteristics are summarized in **Table 1**. There were no significant differences in  
224 sample characteristics between the pre- and post- training groups. The majority of children  
225 were under 2 years of age and were evenly distributed by sex. Proportions of stunting, wasting,  
226 and underweight were high, with a higher prevalence of stunting  noted in the post-training   
227 group.

228

### 229 Evaluation of Quality- Digit Preference

230 In **Table 2**, prior to training, there was a clear tendency to round to the nearest 0.0 or 0.5  
231 decimals for length, HC, and MUAC. There were no obvious signs of digit preference for weight  
232 measurement. The distribution of terminal digits post-training was evenly distributed for all  
233 measures. Similar patterns exist when examining the DPS. The DPS for length, HC and MUAC  
234 prior to the training exceeded the acceptable limit, while the DPS post-training were below the  
235 acceptable cutoff of 20.

236

## 237 Evaluation of Quality- Means and Standard Deviations of

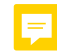

### 238 Anthropometric Indices

239 **Table 3** summarizes the means and standard deviations for length-for-age (LAZ), weight-for-age  
240 (WAZ), and weight-for-length (WLZ), expressed as z scores. The standard deviations of all  
241 indices exceeded acceptable values both pre- and post-training. There were no differences in  
242 WAZ and WLZ pre- and post-training, but there was a statistically significant increase in LAZ  
243 post-training. There was a substantial loss in sample size when examining WLZ using WHO  
244 growth standards with 12% data loss in the pre- and 22% loss in the post-training group. There  
245 were no significant changes between the SDs for LAZ and WAZ pre- and post-training overall,  
246 and when stratified by age (<1 month vs 1-59 months as well as <6 months vs 6-59 months).

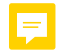

247

## 248 Evaluation of Precision-Technical Errors of measurement

249 **Table 4** presents the TEMs and rTEMs specific to the post-training measures.  
250 The TEMs for length, weight, HC, and MUAC were, 0.32, 0.01, 0.18, and 0.13 respectively. The  
251 rTEMs for length, weight, HC, and MUAC were 0.53%, 0.29%, 0.48%, and 1.24%, respectively.  
252 All TEMs and rTEMs were within the acceptable range.

253

## 254 Accuracy- Spearman Correlation and Bland Altman Plots

255 Spearman correlation coefficients (Fig 1) comparing the manual measures to the 3D scans for  
256 length, MUAC, and HC were 0.99, 0.91, and 0.93, respectively. While the manual measures  
257 were highly correlated with the scans, the mean differences between scans and manual  
258 measures for length, MUAC, and HC were 1.61 cm, -0.20 cm, and 2.27 cm, respectively. These  
259 results suggest that the scans overestimate length by 1.61 cm, underestimate MUAC by 0.20  
260 cm, and overestimate HC by 2.27 cm.

261

262 While there were challenges in securing data at the CHOA site, findings were complementary to  
263 those in the Kenya site. Among the 3 cases, standard anthropometry measurements were  
264 feasible and showed high precision (rTEMs for manual length, MUAC, and HC were 0.62%,  
265 0.96%, and 1.80% respectively). For 3D scans, precision for duplicate scans was within  
266 acceptable limits when measuring length (rTEM=1.05%), but the software had more difficulty  
267 capturing precise measurements for MUAC (rTEM=4.71%) and HC (rTEM=1.62%).

268

## 269 Qualitative findings

270 The post-intervention survey revealed that all participants felt that training in manual  
271 anthropometry improved the accuracy of their measurements. Additionally, all participants  
272 reported feeling confident in their ability to perform manual anthropometry. While most  
273 participants (66.7%) believed that 3D imaging reduced measurement time in comparison to  
274 manual anthropometry, all participants overall preferred the use of manual anthropometry.

275

276 The qualitative findings from the in-depth interviews revealed that the team had a clear  
277 preference for manual anthropometry over the 3D imaging software as they felt the 3D imaging  
278 software required more time, better lighting, improved morgue environment, and training to  
279 ensure an accurate scan.

280

281 *“We would take manual anthropometric measurements more seriously and*  
282 *would choose it well over 3D scanning...A lot of movement and manipulation of*  
283 *the camera to capture the entire body. And many times for 3D imaging, you have*  
284 *to repeat the process over and over and over again for you to be able to get the*  
285 *entire body into the screen. So it takes quite a bit more time...The boards work*  
286 *really well for us. It’s a stable board... it’s something we opt for over any other*  
287 *methods.”*

288

289 Additionally, study investigators cited challenges in using the software when lighting was  
290 insufficient or when morgue environments varied.

291

292 *“For what we experienced on the 3D, we had a few issues ... our autopsy table*  
293 *had a fixed length and was not adjustable, so it was hard to get the complete*  
294 *image as you scan. Many times, we had issues with lighting systems. This made*  
295 *us end up with cut images—images with some parts of the body missing. So that*  
296 *called for checking and re-checking of images for quite a long period of time.”*

297

298 Lastly, study investigators noted postmortem-specific challenges to manual anthropometry and  
299 understood the implications of taking careful measurement and attention to details to ensure  
300 data quality and minimize measurement.

301

302 *“With rigor mortis, you will find that children stiffening, even the legs stiffening in*  
303 *some specific direction. If you are not able to manipulate them properly, one will*  
304 *end up with increased length as opposed to getting the accurate length. So that*  
305 *also required a lot of keenness.”*

306

307 *“The challenge in checking MUAC with tape measure comes when the subject*  
308 *you are measuring has reduced skin turgor. That is the skin of the arm becomes*  
309 *floppy. So that one might give you a lesser MUAC.”*

310

311

## 312 **Discussion**

313 Following training on manual anthropometry and use of standard equipment for post-mortem  
314 assessment of nutritional status, data quality and precision improved; however, standard  
315 deviations of anthropometric indices pre- and post-training exceeded acceptable values. 3D  
316 imaging scans overestimated length by approximately 1.6 cm, underestimated MUAC by 0.2  
317 cm, and overestimated HC by 2.3 cm. The presence of rigor mortis did not impede the

318 collection or quality of manual anthropometry measurements; however, additional care and  
319 pressure are critical to ensuring high quality data.

320  
321 Digit preference improved for length, HC and MUAC following the training. There was no  
322 evidence of digit preference for weight pre- or post-training, which is likely due to how the  
323 measurements were taken. Weight was read from a digital scale, while length and  
324 circumference measurements were reliant on the anthropometrist's ability to use the  
325 equipment properly and read a tape measure accurately. Previous studies among living children  
326 have shown that the SD of anthropometric z-scores are reasonably consistent across  
327 populations, irrespective of nutritional status, and thus can be used to assess the quality of  
328 anthropometric data [32]. The SD for all anthropometric indices exceeded acceptable limits both  
329 pre- and post-training, and sensitivity analyses revealed that high SDs for LAZ and WAZ were  
330 unlikely to be explained by age. If we continue with the conclusion that the intervention may  
331 have improved data quality and precision, then the persistently high SDs may be explained by  
332 capturing anthropometric measurements of small, severely ill children.

333 We also noted a decrease in sample size when examining WLZ scores. This is because nearly  
334 one-fourth of children in this sample fell below 45 cm, or the smallest length captured by the  
335 WHO growth standards when calculating WLZ [31]. The WHO growth standards were based on  
336 a healthy population of children, receiving optimal nutrition, raised in optimal environments,  
337 and receiving optimal healthcare - unlike the cases captured in CHAMPS. Many of the CHAMPS  
338 cases, at the end of life, had severe malnutrition and had body sizes not compatible with  
339 postnatal life and survival based on their chronologic age. Future research might consider  
340 application of the INTERGROWTH-21 (IG21-GS) standards [33] to classify nutritional status of  
341 children that fall outside of the WHO growth standards, such as in the case of severely ill  
342 cohorts of young children in CHAMPS.

343 This study has multiple strengths. First, to our knowledge, no research has been conducted on  
344 the feasibility of using gold-standard anthropometric assessment in the postmortem setting.  
345 Assessment of malnutrition and standardization of growth within the field of nutrition is  
346 typically based on z-scores derived from the 2006 WHO's Multicentre Growth Reference Study  
347 (MGRS). These standards are based on healthy, living children. Utilizing anthropometric data  
348 from CHAMPS, a large, multi-site surveillance system designed to elucidate the causes of U5M  
349 in high mortality regions of the world, may help inform the possible ranges of anthropometric  
350 deficits in severely ill populations. Second, our project captured staff reflections of conducting  
351 manual anthropometry of young children in field-based and clinical-morgue post-mortem  
352 settings. These qualitative findings may prove useful in informing strategies to improve the  
353 accuracy of post-mortem anthropometry.

354 This project was also subject to several limitations. First, in the CHOA site, we encountered  
355 unexpected obstacles in reaching our goal sample size due to limited time to perform the  
356 manual and 3D imaging anthropometric measurements before autopsies were performed.  
357 Further, the added data collection steps placed a significant burden on clinical staff and led to  
358 disruption of their workflow. Second, in Kenya, challenges arose with the 3D imaging software.  
359 The software settings were subject to user error and were altered during data collection, which

360 resulted in a compromised final sample size. Among the viable scans, our results suggest that  
361 the scans overestimated both length and HC. These findings are aligned with a recent study [24]  
362 and further suggest that before 3D imaging can be considered a viable, accurate alternative to  
363 manual anthropometry, adjustment of the technology and additional user testing is warranted  
364 to ensure reliable anthropometric measures.

## 365 **Conclusions**

366 Collection of quality anthropometric data following implementation of standardized training  
367 and equipment is feasible and reliable in postmortem field studies. While 3D imaging may be an  
368 accurate alternative to manual anthropometry, technology adjustments are needed to ensure  
369 accuracy and usability. Future research on the appropriate use of standards to define  
370 malnutrition among severely ill populations, including those in the post-mortem setting, are  
371 needed to elucidate our understanding of the role of malnutrition in U5M a.

372



373 **Acknowledgements**

374

375 The Child Health and Mortality Prevention Surveillance network would like to extend sincere  
376 appreciation to all the families who participated. Additionally, special thanks to Afrin Jahan for her  
377 analysis replication and figure development of Child Health and Mortality Prevention Surveillance  
378 (CHAMPS) network data related to this work.

379

380 **AUTHOR CONTRIBUTIONS**

381 PSS, PMG, KS, and JK designed and conducted the research. PMG analyzed the data, lead the  
382 manuscript development, and is primarily responsible for the final content. All authors have read  
383 and approved the final manuscript.

384

385

386 REFERENCES

- 387 1. *Children: improving survival and well-being*. 2020; Available from:  
388 <https://www.who.int/news-room/fact-sheets/detail/children-reducing-mortality>.
- 389 2. Pelletier, D.L., et al., *The effects of malnutrition on child mortality in developing*  
390 *countries*. Bull World Health Organ, 1995. **73**(4): p. 443-8.
- 391 3. Rice, A.L., et al., *Malnutrition as an underlying cause of childhood deaths associated*  
392 *with infectious diseases in developing countries*. Bull World Health Organ, 2000. **78**(10):  
393 p. 1207-21.
- 394 4. Schroeder, D.G. and K.H. Brown, *Nutritional status as a predictor of child survival:*  
395 *summarizing the association and quantifying its global impact*. Bull World Health Organ,  
396 1994. **72**(4): p. 569-79.
- 397 5. Salzberg, N.T., et al., *Mortality Surveillance Methods to Identify and Characterize Deaths*  
398 *in Child Health and Mortality Prevention Surveillance Network Sites*. Clin Infect Dis,  
399 2019. **69**(Suppl 4): p. S262-s273.
- 400 6. Suchdev, P.S., et al., *Assessment of Neurodevelopment, Nutrition, and Inflammation*  
401 *From Fetal Life to Adolescence in Low-Resource Settings*. Pediatrics, 2017. **139**(Suppl  
402 1): p. S23-s37.
- 403 7. Cashin, K., Oot, L.,. *Guide to Anthropometry: A Practical Tool for Program Planners,*  
404 *Managers, and Implementers*. 2018; Available from:  
405 <https://www.fantaproject.org/tools/anthropometry-guide>.
- 406 8. Gupta, P.M., et al., *Improving assessment of child growth in a pediatric hospital setting*.  
407 BMC Pediatr, 2020. **20**(1): p. 419.
- 408 9. Wit, J.M., et al., *Practical Application of Linear Growth Measurements in Clinical*  
409 *Research in Low- and Middle-Income Countries*. Horm Res Paediatr, 2017. **88**(1): p. 79-  
410 90.
- 411 10. Conkle, J., et al., *Improving the quality of child anthropometry: Manual anthropometry in*  
412 *the Body Imaging for Nutritional Assessment Study (BINA)*. PLoS One, 2017. **12**(12): p.  
413 e0189332.
- 414 11. Mwangome M, B.J., *Measuring infants aged below 6 months: experience from the field*.  
415 Field Exchange, 2014(47).
- 416 12. Bilukha, O., et al., *Comparison of anthropometric data quality in children aged 6-23 and*  
417 *24-59 months: lessons from population-representative surveys from humanitarian*  
418 *settings*. BMC Nutrition, 2020. **6**(1).
- 419 13. Sachdeva, S., et al., *Mid-upper arm circumference v. weight-for-height Z-score for*  
420 *predicting mortality in hospitalized children under 5 years of age*. Public Health Nutr,  
421 2016. **19**(14): p. 2513-20.
- 422 14. McCormack, C.A., et al., *Reliability of body size measurements obtained at autopsy:*  
423 *impact on the pathologic assessment of the heart*. Forensic Sci Med Pathol, 2016. **12**(2):  
424 p. 139-45.
- 425 15. Raghunathan, P.L., S.A. Madhi, and R.F. Breiman, *Illuminating Child Mortality:*  
426 *Discovering Why Children Die*. Clin Infect Dis, 2019. **69**(Suppl 4): p. S257-s259.
- 427 16. Blau, D.M., et al., *Overview and Development of the Child Health and Mortality*  
428 *Prevention Surveillance Determination of Cause of Death (DeCoDe) Process and*  
429 *DeCoDe Diagnosis Standards*. Clin Infect Dis, 2019. **69**(Suppl 4): p. S333-s341.
- 430 17. Mehta, A., *Abstract: Prevalence of undernutrition among children 1-59 months in the*  
431 *Child Health and Mortality Prevention Surveillance (CHAMPS) Network*, in *The 22nd*  
432 *International Union of Nutritional Sciences (IUNS)-International Congress of Nutrition*  
433 *(ICN)*. 2022: Tokyo, Japan.
- 434 18. Perumal, N., et al., *Anthropometric data quality assessment in multisurvey studies of*  
435 *child growth*. Am J Clin Nutr, 2020. **112**(Suppl 2): p. 806s-815s.

- 436 19. Corsi, D.J., J.M. Perkins, and S.V. Subramanian, *Child anthropometry data quality from*  
437 *Demographic and Health Surveys, Multiple Indicator Cluster Surveys, and National*  
438 *Nutrition Surveys in the West Central Africa region: are we comparing apples and*  
439 *oranges?* Glob Health Action, 2017. **10**(1): p. 1328185.
- 440 20. Prudhon, C., et al., *An algorithm to assess methodological quality of nutrition and*  
441 *mortality cross-sectional surveys: development and application to surveys conducted in*  
442 *Darfur, Sudan.* Popul Health Metr, 2011. **9**(1): p. 57.
- 443 21. Rakislova, N., et al., *Standardization of Minimally Invasive Tissue Sampling Specimen*  
444 *Collection and Pathology Training for the Child Health and Mortality Prevention*  
445 *Surveillance Network.* Clinical Infectious Diseases, 2019. **69**(Supplement\_4): p. S302-  
446 S310.
- 447 22. Centers for Disease Control and Prevention, W.H.O., Nutrition International, UNICEF.,  
448 *Micronutrient survey manual.* 2020; Licence: CC BY-NC SA 3.0 IGO:[Available from:  
449 <https://mnsurvey.nutritionintl.org/>.
- 450 23. Jefferds, M.E.D., et al., *Acceptability and Experiences with the Use of 3D Scans to*  
451 *Measure Anthropometry of Young Children in Surveys and Surveillance Systems from*  
452 *the Perspective of Field Teams and Caregivers.* Current Developments in Nutrition,  
453 2022. **6**(6).
- 454 24. Bougma, K., et al., *Accuracy of a handheld 3D imaging system for child anthropometric*  
455 *measurements in population-based household surveys and surveillance platforms: an*  
456 *effectiveness validation study in Guatemala, Kenya, and China.* The American Journal of  
457 Clinical Nutrition, 2022. **116**(1): p. 97-110.
- 458 25. Oliveira, T., et al., *Technical error of measurement in anthropometry (English version).*  
459 *Revista Brasileira de Medicina do Esporte,* 2005. **11**: p. 81-85.
- 460 26. SMART Action Against Hunger—Canada and Technical Advisory Group, *The SMART*  
461 *Plausibility Check for Anthropometry.* 2015.
- 462 27. Conkle, J., et al., *Improving the quality of child anthropometry: Manual anthropometry in*  
463 *the Body Imaging for Nutritional Assessment Study (BINA).* PloS one, 2017. **12**(12): p.  
464 e0189332-e0189332.
- 465 28. Mei, Z. and L.M. Grummer-Strawn, *Standard deviation of anthropometric Z-scores as a*  
466 *data quality assessment tool using the 2006 WHO growth standards: a cross country*  
467 *analysis.* Bull World Health Organ, 2007. **85**(6): p. 441-8.
- 468 29. Dirk Schumacher, *anthro: Computation of the WHO Child Growth Standards.* 2021.
- 469 30. RStudioTeam., *RStudio: Integrated Development Environment for R. RStudio, PBC.,*  
470 2022: Boston, MA URL.
- 471 31. *WHO Child Growth Standards based on length/height, weight and age.* Acta Paediatr  
472 Suppl, 2006. **450**: p. 76-85.
- 473 32. Mei, Z. and L.M. Grummer-Strawn, *Standard deviation of anthropometric Z-scores as a*  
474 *data quality assessment tool using the 2006 WHO growth standards: a cross country*  
475 *analysis.* Bulletin of the World Health Organization, 2007. **85**(6): p. 441-448.
- 476 33. Papageorghiou, A.T., et al., *The INTERGROWTH-21(st) fetal growth standards: toward*  
477 *the global integration of pregnancy and pediatric care.* Am J Obstet Gynecol, 2018.  
478 **218**(2s): p. S630-s640.
- 479 34. Ulijaszek, S.J. and D.A. Kerr, *Anthropometric measurement error and the assessment of*  
480 *nutritional status.* Br J Nutr, 1999. **82**(3): p. 165-77.
- 481
- 482

**Table 1.** Sample characteristics among pre- and post-intervention groups, Manyatta, Kenya

|                                                                                                                             | Pre-intervention,<br>n=75 | Post-intervention,<br>n=76 | p-value <sup>4</sup> |
|-----------------------------------------------------------------------------------------------------------------------------|---------------------------|----------------------------|----------------------|
| <b>Age category, n (%)</b>                                                                                                  |                           |                            |                      |
| <1 day                                                                                                                      | 15 (20.0)                 | 21 (27.6)                  | 0.4821               |
| 1 day – 5 months                                                                                                            | 28 (37.3)                 | 20 (26.3)                  |                      |
| 6 – 23 months                                                                                                               | 23 (30.7)                 | 25 (32.89)                 |                      |
| 24 – 59 months                                                                                                              | 9 (12.0)                  | 10 (13.1)                  |                      |
| <b>Sex, n (%)</b>                                                                                                           |                           |                            |                      |
| Female                                                                                                                      | 31 (41.3)                 | 35 (46.1)                  | 0.5589               |
| <b>Anthropometric measurements, mean (SD)</b>                                                                               |                           |                            |                      |
| Weight, kg                                                                                                                  | 5.0 (3.8)                 | 4.8 (3.5)                  | 0.7543               |
| Length, cm                                                                                                                  | 62.0 (18.0)               | 60.0 (17.6)                | 0.4899               |
| Head circumference (HC), cm                                                                                                 | 39.0 (6.9)                | 37.9 (7.4)                 | 0.3509               |
| Mid-Upper Arm Circumference (MUAC), cm                                                                                      | 11.0 (3.0)                | 10.2 (3.0)                 | 0.1064               |
| <b>Nutritional status, n (%)</b>                                                                                            |                           |                            |                      |
| Stunting (LAZ <sup>1</sup> <-2SD)                                                                                           | 24 (32.0)                 | 38 (50.0)                  | 0.0246               |
| Wasting (WLZ <sup>2</sup> <-2SD)                                                                                            | 58 (77.3)                 | 54 (71.2)                  | 0.3780               |
| Underweight (WAZ <sup>3</sup> <-2)                                                                                          | 40 (53.3)                 | 50 (65.8)                  | 0.1188               |
| <sup>1</sup> LAZ: Length-for-age z-score                                                                                    |                           |                            |                      |
| <sup>2</sup> WLZ: Length-for-weight z-score                                                                                 |                           |                            |                      |
| <sup>3</sup> WAZ: Weight-for-age z-score                                                                                    |                           |                            |                      |
| <sup>4</sup> p-values calculated using Chi Sq tests (age, sex, nutritional status) or t-tests (anthropometric measurements) |                           |                            |                      |

**Table 2.** Manual anthropometry digit preference scores<sup>1</sup> pre- and post-intervention, Manyatta, Kenya

|                                           | Pre- intervention, (N=75) |           |           |           | Post- intervention, (N=76) |           |           |           |
|-------------------------------------------|---------------------------|-----------|-----------|-----------|----------------------------|-----------|-----------|-----------|
|                                           | n(%)                      |           |           |           | n(%)                       |           |           |           |
|                                           | Length                    | Weight    | HC        | MUAC      | Length                     | Weight    | HC        | MUAC      |
| <b>0.0</b>                                | 65 (86.7)                 | 15 (20.0) | 57 (77.3) | 54 (72.0) | 3 (4.0)                    | 10 (13.2) | 5 (6.6)   | 2 (2.6)   |
| <b>0.1</b>                                | -                         | 2 (2.7)   | -         | -         | 12 (15.6)                  | 8 (10.5)  | 11 (14.5) | 18 (23.7) |
| <b>0.2</b>                                | -                         | 6 (8.0)   | -         | -         | 7 (9.2)                    | 9 (11.8)  | 9 (11.8)  | 10 (13.2) |
| <b>0.3</b>                                | -                         | 9 (12.0)  | -         | -         | 13 (17.1)                  | 4 (5.3)   | 3 (3.9)   | 9 (11.8)  |
| <b>0.4</b>                                | -                         | 6 (8.0)   | -         | -         | 5 (6.6)                    | 9 (11.8)  | 9 (11.8)  | 5 (6.6)   |
| <b>0.5</b>                                | 10 (13.3)                 | 6 (8.0)   | 17 (22.7) | 21 (28.0) | 6 (7.9)                    | 9 (11.8)  | 8 (10.5)  | 9 (11.8)  |
| <b>0.6</b>                                | -                         | 11 (14.7) | -         | -         | 7 (9.2)                    | 10 (13.2) | 13 (17.1) | 5 (6.6)   |
| <b>0.7</b>                                | -                         | 9 (12.0)  | -         | -         | 8 (10.5)                   | 4 (5.3)   | 1 (1.3)   | 5 (6.6)   |
| <b>0.8</b>                                | -                         | 5 (6.7)   | -         | -         | 8 (10.5)                   | 6 (7.9)   | 12 (15.8) | 8 (10.5)  |
| <b>0.9</b>                                | -                         | 6 (8.0)   | -         | -         | 7 (9.2)                    | 7 (9.2)   | 5 (6.6)   | 5 (6.6)   |
| <b>Digit preference score<sup>1</sup></b> | 86.2                      | 15.3      | 78.1      | 74.3      | 10.4                       | 9.5       | 16.6      | 18.4      |

<sup>1</sup>Digit preference scores computed using Mark Myatt and Ernest Guevarra (2022).

nipnTK: National Information Platforms for Nutrition

Anthropometric Data Toolkit. <https://nutriverse.io/nipnTK/>,

<https://github.com/nutriverse/nipnTK>

DPS<20 is acceptable; ≥20 indicates digit preference is problematic

487

488

**Table 3.** Means and standard deviations for manual anthropometric indices, Manyatta, Kenya

|                                | Pre-training, (N=75) |            | Post-training, (N=76) |            | p-value <sup>1</sup> | Expected SD for high data quality [28] |
|--------------------------------|----------------------|------------|-----------------------|------------|----------------------|----------------------------------------|
|                                | n                    | Mean (SD)  | n                     | Mean (SD)  |                      |                                        |
| <b>LAZ<sup>2</sup> overall</b> | 75                   | -1.1 (2.6) | 76                    | -2.5 (2.9) | 0.0018               | <b>1.1 – 1.3</b>                       |
| < 1 months                     | 35                   | -0.8 (2.8) | 31                    | -3.0 (3.2) |                      |                                        |
| 1-59 months                    | 40                   | -1.4 (2.3) | 45                    | -2.2 (2.7) |                      |                                        |
| <b>WAZ<sup>3</sup> overall</b> | 75                   | -2.6 (2.3) | 76                    | -3.2 (2.4) | 0.0962               | <b>1.0 – 1.2</b>                       |
| < 1 months                     | 35                   | -2.0 (2.2) | 31                    | -2.9 (2.2) |                      |                                        |
| 1-59 m months                  | 40                   | -3.1 (2.3) | 45                    | -3.5 (2.5) |                      |                                        |
| <b>WLZ<sup>4</sup> overall</b> | 66                   | -3.1 (1.8) | 59                    | -2.9 (2.2) | 0.4777               | <b>0.85 – 1.1</b>                      |
| < 1 months                     | 28                   | -2.6 (1.1) | 15                    | -1.5 (1.3) |                      |                                        |
| 1-59 months                    | 38                   | -3.5 (2.1) | 44                    | -3.3 (2.3) |                      |                                        |

<sup>1</sup> p-values comparing overall pre- and post-training mean z-scores calculated using t-tests

<sup>2</sup> LAZ: Length-for-age z-score

<sup>3</sup> WLZ: Length-for-weight z-score

<sup>4</sup> WAZ: Weight-for-age z-score

489

490

**Table 4.** Manual anthropometry technical errors of measurement for post-intervention measures, Manyatta, Kenya,

|                                         | Length (cm) | Weight (kg) | Mid-Upper Arm Circumference (cm) | Head Circumference (cm) |
|-----------------------------------------|-------------|-------------|----------------------------------|-------------------------|
| <b>TEM<sup>A</sup></b>                  | 0.32        | 0.01        | 0.13                             | 0.18                    |
| <b>Acceptable TEM<sup>[34]</sup></b>    | 0.35        | 0.17        | 0.26                             | -                       |
| <b>VAV</b>                              | 60.00       | 4.84        | 10.22                            | 37.88                   |
| <b>Relative TEM (% TEM)<sup>c</sup></b> | 0.53%       | 0.29%       | 1.24%                            | 0.48%                   |

The technical error of measurement (TEM) is defined as the standard deviation of differences between repeated measures in the unit of the measurement, using the following equation

<sup>A</sup> Equation 1: absolute technical errors of measurement (TEM) =  $\sqrt{\frac{\sum d_i^2}{2n}}$

Where:

$\sum d_i^2$  = Squared summation of deviations, n = number of individuals measured, and i = number of deviations

<sup>c</sup> Equation 2: relative TEM =  $100 \times \frac{TEM}{VAV}$

Where TEM = technical error of measurement expressed as %, VAV= variable average value, the relative TEM (%TEM), and the coefficient of reliability (R) were the statistical tests used to assess intra- and inter-observer reliability. The TEM was defined as the standard deviation of differences between repeated measures in the unit of the measurement (e.g., TEM for height measured in centimeters is cm), using the following equation:

Skillful anthropometrists relative technical errors of measurement (%TEM) cutoff  $\leq 1.5\%$  [25]

491

492

493

494 **FIGURES**

495 **Figure 1.** Bland Altman Plots for Length, Arm Circumference, and Head Circumference  
496 comparing manual anthropometry and 3D imaging, Manyatta, Kenya

---

497

498

499

---

500 **Y-axis:** the difference between the scans and the manual measurements by the average of the  
501 two methods

502 **X-axis:** the average of the scan and manual measures.

503

504 **Dotted lines:** represent the mean difference  $\pm$  3 standard deviations

505 **Dashed lines:** represent the mean difference  $\pm$  2 SD.

506 **Solid line:** across the plot is the no difference line.

507

508 Black points on the chart represent the 23 cases for which we had viable 3D scan data.

509 Spearman correlation coefficients were examined to measure the strength of the relationship  
510 between scans and manual measures.

511

512 AC: Arm Circumference, HC: Head Circumference



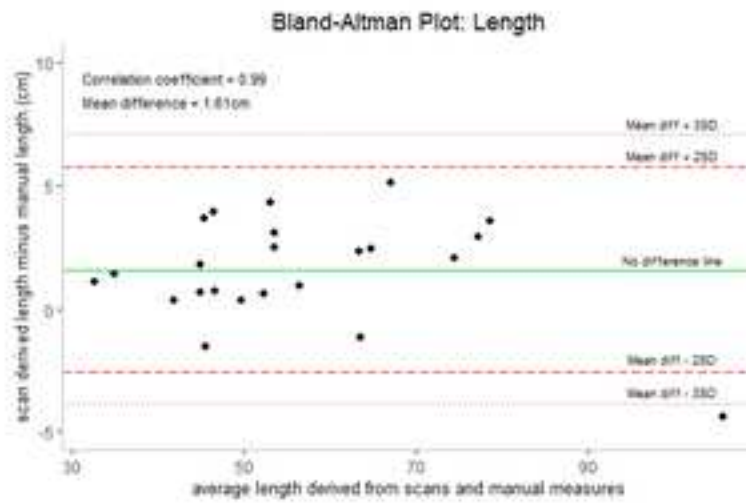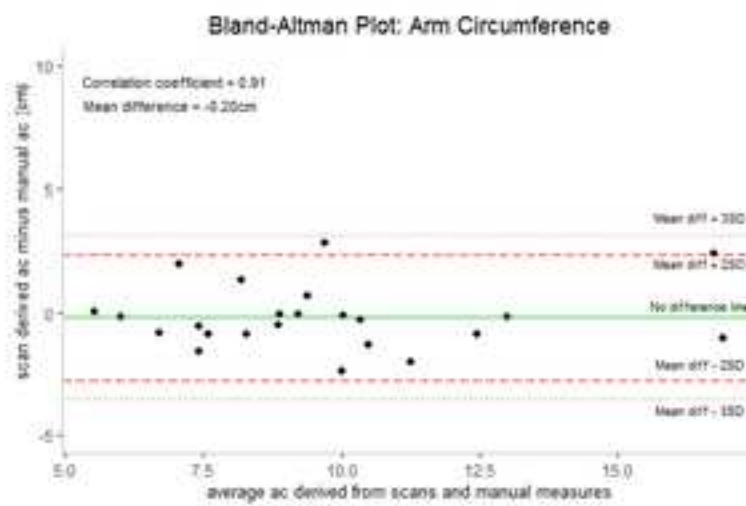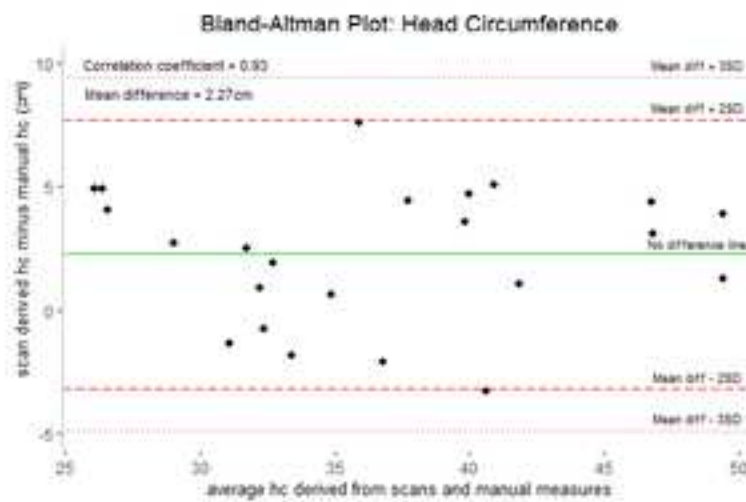

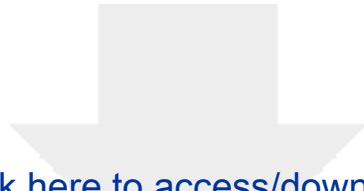

[Click here to access/download](#)

**Supporting Information**

[choa\\_anthropometry\\_evaluation\\_data.xlsx](#)

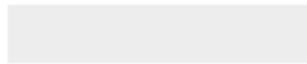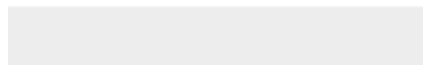



[Click here to access/download](#)

**Supporting Information**

[kenya\\_anthropometry\\_evaluation\\_data.xlsx](#)

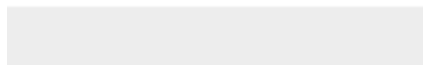

1 **Impact of anthropometry training and feasibility of 3D imaging on anthropometry data**  
2 **quality among children under five years in a postmortem setting**  
3 **Feasibility and accuracy of**  
4 **performing manual anthropometry in the postmortem setting**

5 Priya M. Gupta<sup>1</sup>, Kasthuri Sivalogan<sup>1</sup>, Richard Oliech<sup>2</sup>, Eugene Alexander<sup>3</sup>, Jamie Klein<sup>4</sup>, O. Yaw.  
6 Addo<sup>1,6</sup>, Dickson Gethi<sup>5</sup>, Victor Akelo<sup>5</sup>, Dianna M. Blau<sup>6</sup>, Parminder S. Suchdev<sup>1,2,4,6\*</sup>

7  
8 **Author affiliates**

- 9 <sup>1</sup> Nutrition and Health Sciences Program, Laney Graduate School, Emory University, Atlanta,  
10 GA, USA  
11 <sup>2</sup> Kenya Medical Research Institute, Kisumu, Kenya  
12 <sup>3</sup> Body Surface Translations, Inc. (BST), Athens, GA, USA  
13 <sup>4</sup> Emory University School of Medicine, Atlanta, GA, USA  
14 <sup>5</sup> US Centers for Disease Control and Prevention-Kenya, Kisumu and Nairobi, Kenya  
15 <sup>6</sup> US Centers for Disease Control and Prevention, Atlanta, GA, USA

16  
17 **Sources of Support:** This work was funded by grant OPP1126780 from the Bill & Melinda Gates  
18 Foundation

19  
20 **Conflicts of interest:**

21 Eugene Alexander holds an ownership position in Body Surface Translations and therefore has a  
22 financial interest in the success of the 3D testing device described in this study. Data were  
23 blinded and not shared with Mr. Alexander until completion of draft manuscript.

24  
25 **Additional disclosure:** The findings and conclusions in this report are those of the authors and  
26 do not necessarily represent the official position of the Centers for Disease Control and  
27 Prevention.

28  
29 **Role of the Funder/Sponsor:** The funder participated in discussions of study design and data  
30 collection. They did not participate in the conduct of the study; the management, analysis, or  
31 interpretation of the data; preparation, review, or approval of the manuscript; or decision to  
32 submit the manuscript for publication.

33  
34 **Data Sharing:** Data described in the manuscript, code book, and analytic code will be made  
35 available upon request pending [e.g., application and approval, payment, other].

36  
37 **\*Corresponding Author Information**

38 **Priya M. Gupta**  
39 **1534 Clifton Road**  
40 **R-620**  
41 **Atlanta, GA 30322**  
42 **phone: 908-418-0970**  
43 **[pmgupta@emory.edu](mailto:pmgupta@emory.edu)**  
44 **[Parminder S Suchdev](#)**  
**1599 Clifton Rd NE**

45 [Atlanta, GA 30322](#)  
46 [psuchde@emory.edu](mailto:psuchde@emory.edu)

47  
48 **Running Title:** Anthropometry in the postmortem setting  
49

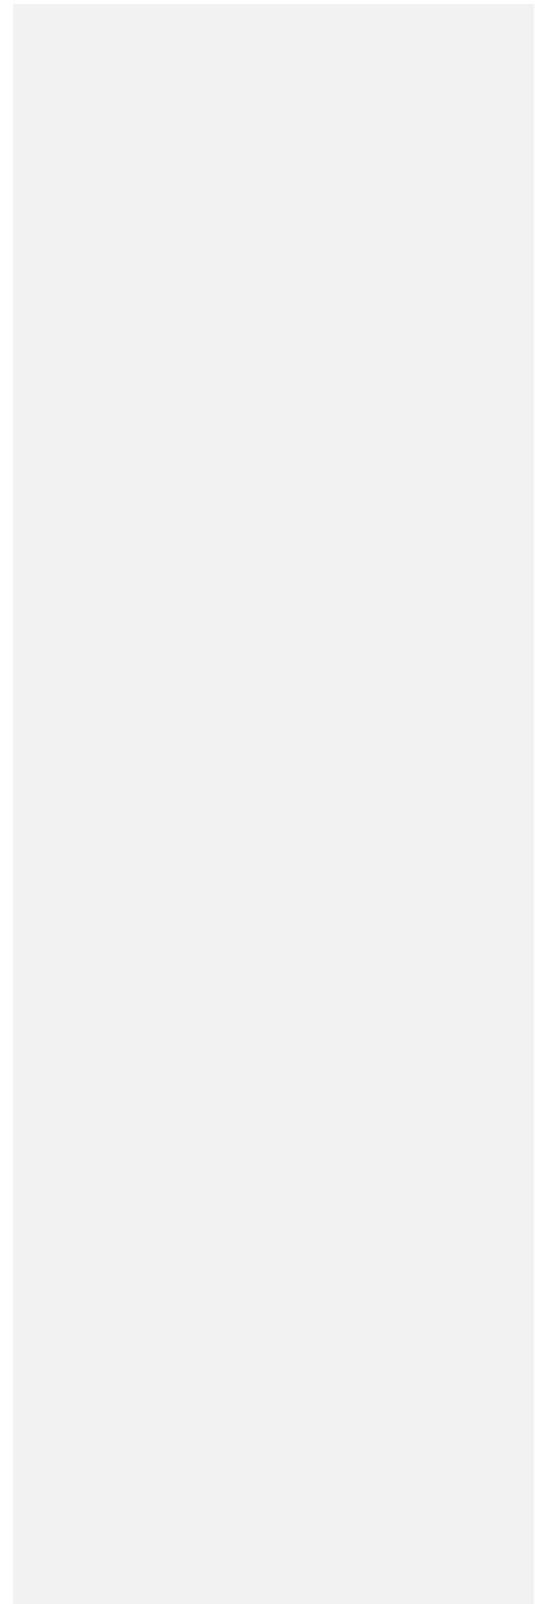

## 50 ABSTRACT Abstract

Formatted: Font: 18 pt

Formatted: Font: 18 pt

51  
52 **BACKGROUND:** The Child Health and Mortality Prevention Surveillance Network (CHAMPS)  
53 identifies causes of under-5 mortality in high mortality countries.

54  
55 **OBJECTIVE:** To address challenges in postmortem nutritional assessment, we evaluated the  
56 impact of anthropometry training and the feasibility of 3D imaging on data quality within the  
57 CHAMPS Kenya site.

58  
59 **DESIGN:** Staff were trained using World Health Organization (WHO)-recommended manual  
60 anthropometry equipment and novel 3D imaging methods to collect postmortem  
61 measurements. Following training, 76 deceased children were measured in duplicate and were  
62 compared to measurements of 75 pre-training deceased children. Outcomes included measures  
63 of data quality (standard deviations (~~SD~~) of anthropometric indices and digit preference scores  
64 (DPS)), precision (absolute and relative technical errors of measurement, TEMs or rTEMs), and  
65 accuracy (Bland-Altman plots). WHO growth standards (~~WHO-GS~~) were used to produce  
66 anthropometric indices. Post-training surveys and in-depth interviews collected qualitative  
67 feedback on measurer experience with performing manual anthropometry and ease of using 3D  
68 imaging software.

69  
70 **RESULTS:** Manual anthropometry data quality improved after training, as indicated by DPS.  
71 Standard deviations of anthropometric indices exceeded limits for high data quality when using  
72 the WHO [growth standards-GS](#). Reliability of measurements post-training was high as indicated  
73 by rTEMs below 1.5%. 3D imaging was highly correlated with manual measurements; however,  
74 on average 3D scans overestimated length and ~~HC-head circumference~~ by 1.61 cm and 2.27 cm,  
75 respectively. Site staff preferred manual anthropometry to 3D imaging, as the imaging  
76 technology required adequate lighting and additional ~~nuance-considerations~~ when performing  
77 the measurements.

78 **CONCLUSIONS:** Manual anthropometry was feasible [and reliable postmortem](#) in [the](#) presence  
79 of rigor mortis, [and training improved digit preference](#). 3D imaging may be an accurate  
80 alternative to manual anthropometry, but technology adjustments are needed to ensure  
81 accuracy and usability. [Future research on the appropriate use of current growth standards to](#)  
82 [define malnutrition in this severely ill population is needed.](#)  
83

85 Malnutrition is estimated to contribute to approximately half of under-5-mortality (U5M) [1-3].  
86 Malnutrition is also a major cause of morbidity as malnutrition plays a critical role in child  
87 neurodevelopment and health across the life course [2-4]. Reliable assessment tools for  
88 malnutrition are essential to reflect individual status, measure biological function, and predict  
89 health outcomes [5-7]. In children, inadequate growth is defined according to anthropometric  
90 measurements (length, weight, head and mid-upper arm circumference) that fall below 2  
91 standard deviations of the normal sex-specific weight-for-length (wasting), length-for-age  
92 (stunting), and weight-for-age (underweight) [7]. Despite the importance of accurate  
93 anthropometry to detect early signs of malnutrition and monitor child growth, health facilities  
94 routinely use non-standardized anthropometric equipment, and as a result, measurements are  
95 often inaccurate [8]. Inaccurate measurements can lead to spurious classification of  
96 malnutrition in both individuals and populations[9].

97 In addition to the challenges of procuring and using standard anthropometric measurement  
98 tools, anthropometric measurements are subject to human error and are particularly difficult to  
99 collect among young children as children are easily distressed, have difficulty staying still, and  
100 may be unable to meet the requirements (i.e. ability to lie down or stand up) for manual  
101 anthropometry [10-12]. Anthropometric measurements are particularly challenging in  
102 hospitalized settings or in medically complex patients ~~due to difficulty taking measurements~~  
103 due to ~~medical equipment that may impede taking measurements (e.g., intravenous lines or~~  
104 ~~IV's, feeding tubes)~~, severe illness, or limitations in mobility. These children are also at highest  
105 risk of malnutrition [8, 13]. Additionally, qualitative findings from a quality improvement study  
106 in a children's hospital found that, wooden height-length measuring boards (ShorrBoard®,  
107 Weigh and Measure, LLC, Maryland USA) were considered to be "*heavy, cumbersome to*  
108 *assemble, frightening to patients, and required pre-planning and coordination between clinical*  
109 *staff with busy schedules and competing priorities*" [8]. Lastly, in field settings, the weight of the  
110 board may impede transportation and movement within the field and lack of standardization  
111 and maintenance of anthropometric equipment across study sites may contribute to poor data  
112 quality and misclassification [10, 11]. The post-mortem setting is another environment in which  
113 manual anthropometry may be challenging. Morgue capacity, rigor mortis, and edema can  
114 impact the quality and accuracy of measurements [14]. To our knowledge, no research has  
115 been conducted on the feasibility of using gold-standard anthropometric assessment in the  
116 postmortem setting.

117 The Child Health and Mortality Prevention Surveillance (CHAMPS) network is a multi-site  
118 surveillance system which strives to identify and understand the causes of under-5-mortality  
119 (U5M) in seven surveillance sites in sub-Saharan Africa and South Asia through detailed cause  
120 of death attribution with the use of high-quality postmortem anthropometrics, tissue samples,  
121 clinical abstraction, verbal autopsy, and the ability to integrate data from site-specific health  
122 and demographic surveillance systems (HDSS) [15, 16]. A recent analysis of the postmortem  
123 anthropometric data in CHAMPS suggested that nearly 90% of cases 1-59 months had evidence  
124 of undernutrition (stunting, wasting, or underweight) [17]. Given these data, it is possible that

125 malnutrition is directly or indirectly associated with child mortality. However, our  
126 understanding of the relationship between malnutrition and mortality may also be hindered by  
127 poor anthropometric measurement data quality, including digit preference (e.g. measurement  
128 rounding), high percentage of biologically implausible values, and standard deviations for  
129 anthropometric indices that exceed acceptable limits, which may lead to misclassification of  
130 malnutrition [18-20]. These data quality and precision outcomes may be a result of shortages of  
131 standard equipment in CHAMPS sites, lack of training on manual anthropometry, or difficulty in  
132 conducting manual anthropometry in the postmortem setting (rigor mortis, poor lighting in  
133 morgue facilities).

134 Our primary objectives were to determine whether manual anthropometry is feasible in the  
135 postmortem setting and to quantify the impact of training and standard equipment on data  
136 quality. Given the practical challenges of performing manual anthropometry in field and  
137 hospital-based settings, various 3D imaging approaches have also been developed to obtain  
138 anthropometric measurements. An efficacy study conducted at Emory University found that a  
139 3D imaging software was as accurate as gold-standard manual anthropometry among under-5  
140 children in Atlanta-area daycare centers [10]. However, data are also needed to assess 3D  
141 imaging in challenging hospital- or field-based settings. Therefore, our secondary objective was  
142 to assess the validity and acceptability of 3D imaging for anthropometric assessment compared  
143 to gold-standard manual anthropometry.

144  
145

## 146 **METHODS** Materials and methods

### 147 Study site and data collection

148 This ~~longitudinal quality improvement anthropometry~~ study took place from October 2018 to  
149 September 2019 in the CHAMPS Manyatta, Kenya site located at the Jaramogi Oginga Odinga  
150 Teaching and Referral Hospital (JOOTRH). Prior to the training, site staff performed manual  
151 anthropometry on 75 deceased children as a routine part of the minimally invasive tissue  
152 sampling (MITS) portion of CHAMPS data collection. The MITS procedure is an abridged  
153 postmortem examination technique that has been validated for cause of death investigation in  
154 low-resource settings, described in detail ~~elsewhere in an earlier study~~ [21]. Written informed  
155 consent was obtained from families as part of the CHAMPS enrollment procedures. The  
156 CHAMPS protocol was approved by ethics committees in Kenya and at Emory University,  
157 Atlanta, GA, USA. Additional information regarding the ethical, cultural, and scientific  
158 considerations specific to inclusivity in global research is included in the Supporting  
159 Information.

160  
161 Upon conclusion of pre-training data collection, a senior nutritionist, pediatrician, and  
162 anthropometry expert led and conducted an on-site 1-week training on manual anthropometry  
163 and the 3D imaging scanner for 6 staff. Using materials developed by the CDC, WHO and  
164 UNICEF, the training on manual anthropometry emphasized best practices for accurate  
165 manual measures of length, weight, ~~and head~~ circumference (HC) and mid-upper arm  
166 circumference (MUAC) measurements using two trained anthropometrists and standard

Formatted: Font: 18 pt

Formatted: Font: 16 pt, Bold



167 operating procedures [22]. Standard equipment in both sites, including wooden height-length  
168 measuring boards (ShorrBoard®, Weigh and Measure, LLC, Maryland USA), digital scales (Rice  
169 Lake Weighing Systems, Inc., Rice Lake, WI), and standard tape measures (Weigh and Measure  
170 LLC, Maryland USA), were used to ensure accurate measurement of recumbent length, weight,  
171 ~~and head circumference (HC) and mid-upper arm circumference (MUAC)~~, respectively. [Staff](#)  
172 [completed an anthropometry standardization exercise using live children to ensure](#)  
173 [competence in conducting manual anthropometry](#). Staff were also trained on proper use the 3D  
174 imaging software [using dolls and live children](#); details on the imaging software are provided  
175 ~~elsewhere in earlier studies~~ [10, 23, 24]. Briefly, the AutoAnthro system uses an iPad™ tablet,  
176 and a Structure Sensor™ camera attached to the tablet to capture non-personally identifiable  
177 anthropometric scan images of the deceased child. [Following the training, two trained](#)  
178 [anthropometrists manually collected anthropometric measurements for 76 cases, with two](#)  
179 [separate measurements collected per case by different anthropometrists](#). ~~Following the training,~~  
180 ~~two unique site staff each performed manual anthropometry on 76 new cases, for a total of 2~~  
181 ~~manual measures per case~~. Additionally, 3D scans were completed in duplicate for each  
182 anthropometrist, for a total of 4 scans per case. [During data processing, after the completion of](#)  
183 [data collection, it was identified that the AutoAnthro software settings had been inadvertently](#)  
184 [altered for a significant number of cases, resulting in a final sample size of 23 cases](#). ~~Following~~  
185 ~~data collection, it was found that the software settings had been inadvertently altered on the~~  
186 ~~scanner resulting in viable scan data on only 23 cases~~.

187

## 188 **Outcomes of interest**

189 Key outcomes of interest included measures of data quality, precision, and accuracy. Data  
190 quality outcomes indicators included digit preference and standard deviations (SD) of  
191 anthropometric indices. Digit preference is the examination of a uniform distribution of  
192 terminal digits. We also calculated a digit preference score (DPS) to evaluate digit preference  
193 [25]. The DPS ranges from 0 to 100. Scores are low in instances of high agreement with the  
194 ideal of non-preference of the terminal digits, whereas DPS rises as the measures deviate from  
195 a uniform distribution across the terminal digits 0 through 9. In previous studies, a DPS cutoff  
196 above 20 was used to define the presence of digit preference [26, 27]. [We thus used DPS<20 as](#)  
197 [acceptable, and DPS≥20 to indicate digit preference was problematic](#). Previous studies have  
198 suggested acceptable standard deviation ranges specifically for data quality among living  
199 children [28]. These include 1.10-1.30, 1.00-1.20, 0.85-1.10 for length-for-age (HAZ), weight-for-  
200 age (WAZ), and weight-for-length (WLZ) z-scores, respectively. Z-scores for anthropometric  
201 indices were produced using the [World Health Organization WHO Multicentre Growth](#)  
202 [Reference Study growth standards \(WHO-GS\)](#)-anthro R package [29].

203

204 Technical errors of measurement (TEM) were used to assess measurement precision. Following  
205 the training, the site staff performed manual anthropometry in duplicate. It is important to  
206 note that this differs from the data collection strategy pre-training in which a single set of  
207 measures were taken. As a result, we were only able to calculate TEMs for the data post-  
208 training in both sites. TEM express the error margin in anthropometry; they are unitless and  
209 allow comparison of errors across measures (e.g., weight, height etc.). Absolute TEMs were

Formatted: Font: 16 pt, Not Italic

210 calculated using the formula outlined in Equation 1 (**Table 4**). Absolute TEMs can also be  
211 transformed into relative TEMs, which express the error as a percentage corresponding to the  
212 total average. Relative TEMs (rTEM) were calculated using the formula outlined in Equation 2  
213 (**Table 4**). We used a cutoff of <1.5% rTEM to indicate a skillful anthropometrist [25].

214  
215 Finally, Bland Altman plots were used to assess the accuracy of the 3D imaging software relative  
216 to manual anthropometry following the training and were quantified in the unit of the measure  
217 (cm or kg). Spearman correlation coefficients examined the strength of the relationship  
218 between scans and manual measures.

219  
220 Following the study, a short survey was sent to the 6 study participants. The survey collected  
221 information on whether the participants believed training on manual anthropometry improved  
222 the accuracy of the measurements, whether 3D imaging reduced the time to measure, and  
223 asked about the participants preference in measuring using manual anthropometry or the 3D  
224 imaging technology. We also conducted a 60-minute in-depth interview with the single lead site  
225 technician to collect qualitative feedback on the team's experience with performing manual  
226 anthropometry and ease of using the 3D imaging software. All analyses were conducted in  
227 [RStudio-R statistical software](#) [30]. [Statistical tests were two-sided and evaluated using an alpha](#)  
228 [level equal to 0.05. Pearson's Chi-Square tests \(categorical variables\) or t-tests \(continuous](#)  
229 [variables\) were used to evaluate differences between pre-intervention and post-interventions](#)  
230 [groups. The qualitative data were utilized to improve the implementation of manual](#)  
231 [anthropometric measurements across the CHAMPS Network.](#)

232  
233 We also conducted a small study in collaboration with the Pediatrics and Pathology  
234 departments at Children's Healthcare of Atlanta, Egleston Hospital (CHOA). The goal was to  
235 evaluate whether manual anthropometry and 3D imaging performed consistently in a high-  
236 resource setting with adequate lighting and internet. The same training, detailed above, was  
237 used, and pathology staff notified the anthropometrists upon arrival of a case at the morgue.  
238 Manual anthropometry was to be performed prior to the start of the diagnostic autopsy.  
239 [Significant challenges arose during data collection, including identification of eligible cases and](#)  
240 [availability timing to conduct manual-anthropometry before the start of the diagnostic autopsy.](#)  
241 [Despite best efforts to coordinate between the study team and CHOA team, the study resulted](#)  
242 [in a limited sample size of 3 cases; thus, our results will focus on the Kenya site. Significant](#)  
243 [challenges arose during data collection which resulted in a limited sample size of 3 cases; thus,](#)  
244 [our results will focus on the Kenya site.](#)

## 245 **RESULTS**Results

246  
247 Sample characteristics are summarized in **Table 1**. There were no significant differences in  
248 sample characteristics between the pre- and post- training groups. The majority of children  
249 were under 2 years of age, and were evenly distributed by sex. Proportions of stunting, wasting,  
250 and underweight were high, with a higher prevalence of stunting noted in the post-training  
251 group.

252

Formatted: Font: 18 pt

## Evaluation of Quality- Digit Preference

In **Table 2**, prior to training, there was a clear tendency to round to the nearest 0.0 or 0.5 decimals for length, HC, and MUAC. There were no obvious signs of digit preference for weight measurement. The distribution of terminal digits post-training was evenly distributed for all measures. Similar patterns exist when examining the DPS. [The DPS for length, HC and MUAC prior to the training exceeded the acceptable limit, while the DPS post-training were](#) [The DPS for length, pre-training, exceeded the acceptable limit, and post-training, the DPS for all measures fell](#) below the acceptable cutoff of 20.

Formatted: Font: 16 pt, Not Italic

## Evaluation of Quality- Means and Standard Deviations of Anthropometric Indices

**Table 3** summarizes the means and standard deviations for length-for-age (LAZ), weight-for-age (WAZ), and weight-for-length (WLZ), expressed as z scores. The standard deviations of all indices exceeded acceptable values both pre- and post-training. There were no differences in WAZ and WLZ pre- and post-training, but there was a statistically significant increase in LAZ post-training. There was a substantial loss in sample size when examining WLZ using WHO growth standards with 12% data loss in the pre- and 22% loss in the post-training group. [This decrease in sample size when examining WLZ scores is due to nearly a fourth of the children having lengths below 45 cm or the smallest length captured by the WHO growth standards when calculating WLZ \[31\]. It is important to note that the WHO growth standards were based on a healthy population of children, receiving optimal nutrition, raised in optimal environments, and receiving optimal healthcare – unlike the cases captured in CHAMPS. Many of the CHAMPS cases, at the end of life, had attained sizes that are more comparable to growth and nutritional status in utero and may explain why CHAMPS cases are not compatible with postnatal life and survival at their chronologic age.](#) There were no significant changes between the SDs for LAZ and WAZ pre- and post-training overall, and when stratified by age (<1 month vs 1-59 months as well as <6 months vs 6-59 months, [data not shown](#)).

Formatted: Font: 16 pt, Not Italic

## Evaluation of Precision-Technical Errors of measurement

**Table 4** presents the TEMs and rTEMs specific to the post-training measures. The TEMs for length, weight, HC, and MUAC were, 0.32, 0.01, 0.18, and 0.13 respectively. The rTEMs for length, weight, HC, and MUAC were 0.53%, 0.29%, 0.48%, and 1.24%, respectively. All TEMs and rTEMs were within the acceptable range.

Formatted: Font: 16 pt, Not Italic

## Accuracy- Spearman Correlation and Bland Altman Plots

Spearman correlation coefficients ([Figure 1](#)) comparing the manual measures to the 3D scans for length, MUAC, and HC were 0.99, 0.91, and 0.93, respectively. While the manual measures were highly correlated with the scans, the mean differences between scans and manual measures for length, MUAC, and HC were 1.61 cm, -0.20 cm, and 2.27 cm, respectively. These results suggest that the scans overestimate length by 1.61 cm, underestimate MUAC by 0.20 cm, and overestimate HC by 2.27 cm.

Formatted: Font: 16 pt, Not Italic

Formatted: Font: Not Bold

295 While there were challenges in securing data at the CHOA site, findings were complementary to  
296 those in the Kenya site (~~data not shown~~). Among the 3 cases, standard anthropometry  
297 measurements were feasible and showed high precision (rTEMs for manual length, MUAC, and  
298 HC were 0.62%, 0.96%, and 1.80% respectively). For 3D scans, precision for duplicate scans was  
299 within acceptable limits when measuring length (rTEM=1.05%), but the software had more  
300 difficulty capturing precise measurements for MUAC (rTEM=4.71%) and HC (rTEM=1.62%).

301

### 302 **Qualitative findings: Use of 3D imaging in morgue setting**

303 The post-intervention survey revealed that all participants felt that training in manual  
304 anthropometry improved the accuracy of their measurements. Additionally, all participants  
305 reported feeling confident in their ability to perform manual anthropometry. While most  
306 participants (66.7%) believed that 3D imaging reduced measurement time in comparison to  
307 manual anthropometry, all participants overall preferred the use of manual anthropometry.  
308

309 The qualitative findings from the in-depth interviews revealed that the team had a clear  
310 preference for manual anthropometry over the 3D imaging software as they felt the 3D imaging  
311 software required more time, ~~nuance~~ (better lighting, ~~and~~ improved morgue environment),  
312 and training to ensure an accurate scan.

313

314 *“We would take manual anthropometric measurements more seriously and*  
315 *would choose it well over 3D scanning...A lot of movement and manipulation of*  
316 *the camera to capture the entire body. And many times for 3D imaging, you have*  
317 *to repeat the process over and over and over again for you to be able to get the*  
318 *entire body into the screen. So it takes quite a bit more time...The boards work*  
319 *really well for us. It’s a stable board... it’s something we opt for over any other*  
320 *methods.”*

321

322 Additionally, study investigators cited challenges in using the software when lighting was  
323 insufficient or when morgue environments varied.

324

325 *“For what we experienced on the 3D, we had a few issues ... our autopsy table*  
326 *had a fixed length and was not adjustable, so it was hard to get the complete*  
327 *image as you scan. Many times, we had issues with lighting systems. This made*  
328 *us end up with cut images—images with some parts of the body missing. So that*  
329 *called for checking and re-checking of images for quite a long period of time.”*

330

331 Lastly, study investigators noted postmortem-specific challenges to manual anthropometry and  
332 understood the implications of taking careful measurement and attention to details to ensure  
333 for data quality and minimize measurement error if careful measurement and attention to  
334 detail was not prioritized.

335

336 *“With rigor mortis, you will find that children stiffening, even the legs stiffening in*  
337 *some specific direction. If you are not able to manipulate them properly, one will*

Formatted: Font: 16 pt, Not Italic

338 *end up with increased length as opposed to getting the accurate length. So that*  
339 *also required a lot of keenness.”*

340  
341 *“The challenge in checking MUAC with tape measure comes when the subject*  
342 *you are measuring has reduced skin turgor. That is the skin of the arm becomes*  
343 *floppy. So that one might give you a lesser MUAC.”*

## 346 DISCUSSIONDiscussion

347 Following training on manual anthropometry and use of standard equipment for post-mortem  
348 assessment of nutritional status, data quality and precision ~~were high~~improved; however,  
349 standard deviations of anthropometric indices ~~pre- and post-training~~ exceeded acceptable  
350 values. 3D imaging scans overestimated length by approximately 1.6 cm, underestimated  
351 MUAC by 0.2 cm, and overestimated HC by 2.3 cm. The presence of rigor mortis did not impede  
352 the collection or quality of ~~manual-anthropometry length~~ measurements; however, additional  
353 care and pressure are critical to ensuring high quality data.

354  
355 Digit preference improved for length, HC and MUAC following the training. There was no  
356 evidence of digit preference for weight pre- or post-training, which is likely due to how the  
357 measurements were taken. Weight was read from a digital scale, while length and  
358 circumference measurements were reliant on the anthropometrist’s ability to use the  
359 equipment properly and read a tape measure accurately. ~~Digit preference improved for length,~~  
360 ~~HC and MUAC following the training.~~ Previous studies among living children have shown that  
361 the SD of anthropometric z-scores are reasonably consistent across populations, irrespective of  
362 nutritional status, and thus can be used to assess the quality of anthropometric data [32]. ~~In~~  
363 ~~Kenya,~~ the SD for all anthropometric indices exceeded acceptable limits both pre- and post-  
364 training, and sensitivity analyses revealed that high SDs for LAZ and WAZ were unlikely to be  
365 explained by age. If we continue with the conclusion that the intervention may have  
366 ~~contributed to high~~improved data quality and precision, ~~then~~ ~~the~~ ~~n~~ ~~the~~ persistently high SDs  
367 may be explained by capturing anthropometric measurements of small, severely ill children.

368 We also noted a decrease in sample size when examining WLZ scores. This is because nearly  
369 one-fourth of children in this sample fell below 45 cm, or the smallest length captured by the  
370 WHO growth standards when calculating WLZ [31]. ~~It is important to note that the~~The WHO  
371 growth standards were based on a healthy population of children, receiving optimal nutrition,  
372 raised in optimal environments, and receiving optimal healthcare - unlike the cases captured in  
373 CHAMPS. Many of the CHAMPS cases, at the end of life, had ~~severe malnutrition and had body~~  
374 ~~sizes attained sizes that are more comparable to growth and nutritional status in utero and may~~  
375 ~~explain why CHAMPS cases are~~ not compatible with postnatal life and survival ~~at~~ ~~based on~~ their  
376 chronologic age. Future research might consider application of the INTERGROWTH-21 (IG21-GS)  
377 standards [33] to classify nutritional status of children that fall outside of the WHO ~~growth~~  
378 ~~standards-GS~~, such as in the case of ~~severely ill cohorts of young children as in~~ CHAMPS  
379 ~~enrolled cases. Comparing cases classified using the WHO-Gs versus IG21-GS would enables us~~  
380 ~~to understand how these children would rank, had they had survived.~~

Formatted: Font: 18 pt

381 This study has multiple strengths. First, to our knowledge, no research has been conducted on  
382 the feasibility of using gold-standard anthropometric assessment in the postmortem setting.  
383 Assessment of malnutrition and standardization of growth within the field of nutrition is  
384 typically based on z-scores derived from the 2006 WHO's Multicentre Growth Reference Study  
385 (MGRS). These standards are based on healthy, living children, ~~whereas being severely ill does~~  
386 ~~not have a sufficient comparison group based on anthropometry.~~ Utilizing anthropometric data  
387 from CHAMPS, is a large, multi-site surveillance system, designed to elucidate the causes of  
388 USM in high mortality regions of the world, therefore these standardized anthropometric data  
389 may help inform the possible ranges of anthropometric deficits in severely ill populations.  
390 Second, our project captured staff reflections ~~and criticisms~~ of conducting manual  
391 anthropometry ~~of young children in field-based and clinical-morgue post-mortem settings in~~  
392 ~~field-based and clinical-morgue settings.~~ These qualitative findings may prove useful in  
393 informing strategies to improve ~~the accuracy of~~ post-mortem anthropometry in field-based  
394 and clinical-morgue settings given the structural and practical constraints of the environment.

395 This project was also subject to several limitations. First, in the CHOA site, we encountered  
396 unexpected obstacles in reaching our goal sample size due to limited time to perform the  
397 manual and 3D imaging anthropometric measurements. ~~We learned that not all deceased~~  
398 ~~children undergo autopsy and not all cases are routed to the morgue via the pathology~~  
399 ~~department. When cases were routed to the morgue, there was limited time to conduct~~  
400 ~~standard anthropometry and 3D imaging in duplicate or~~ before autopsies were performed.  
401 Further, the added data collection steps ~~Second, the need for two anthropometrists to arrive at~~  
402 the morgue and collect data before autopsy placed a significant burden on clinical staff and led  
403 to disruption of their workflow. ~~It should be noted, that within the CHOA site, autopsies are~~  
404 ~~performed quickly and, in a step-wise fashion following the death of the child. There was often~~  
405 ~~little time to balance case notification, standard equipment assembly and repeated measures.~~  
406 ~~These challenges explain the limited sample size. Additionally, we found the pathologists were~~  
407 ~~reluctant to using the 3D imaging software and the standard equipment. It appeared that~~  
408 ~~knowledge of the importance of standard equipment was limited, although many had been~~  
409 ~~introduced to the equipment earlier in their professional training. In the CHOA morgues,~~  
410 ~~standard practice for securing postmortem measurements involved use of a tape measure, any~~  
411 ~~deviations to this norm were resisted and were assumed to require additional time.~~  
412 Third ~~Second~~, in Kenya, challenges arose with the 3D imaging software. The software settings  
413 were subject to user error and were altered during data collection, which resulted in a  
414 compromised final sample size. Among the viable scans, our results suggest that the scans  
415 overestimated both length and HC. These findings are aligned with a recent study [24] and  
416 further suggest that before 3D imaging can be considered a viable, accurate alternative to  
417 manual anthropometry, adjustment of the technology and additional user testing is warranted  
418 to ensure reliable anthropometric measures.

## 419 Conclusions

420 Collection of quality anthropometric data ~~and following~~ implementation of standardized  
421 training and equipment is feasible and reliable in ~~population-based,~~ postmortem, field studies.  
422 While 3D imaging may be an accurate alternative to manual anthropometry, technology

Formatted: Font: 18 pt, Bold

423 [adjustments are needed to ensure accuracy and usability](#). Future research on the appropriate  
424 use of standards to define malnutrition among severely ill populations, [including those in the](#)  
425 [post-mortem setting, are needed to](#) ~~will~~ elucidate our understanding of the role of malnutrition  
426 in USM and ~~inform future malnutrition-specific USM reduction interventions~~.

427

428  
429  
430  
431  
432  
433  
434  
435  
436  
437  
438  
439  
440

## **ACKNOWLEDGEMENTS**Acknowledgements

The Child Health and Mortality Prevention Surveillance network would like to extend sincere appreciation to all the families who participated. Additionally, special thanks to Afrin Jahan for her analysis replication and figure development of Child Health and Mortality Prevention Surveillance (CHAMPS) network data related to this work.

### **AUTHOR CONTRIBUTIONS**

PSS, PMG, KS, and JK designed and conducted the research. PMG analyzed the data, lead the manuscript development, and is primarily responsible for the final content. All authors have read and approved the final manuscript.

Formatted: Font: 18 pt



441 **REFERENCES**

- 442 1. *Children: improving survival and well-being*. 2020; Available from:  
443 <https://www.who.int/news-room/fact-sheets/detail/children-reducing-mortality>.
- 444 2. Pelletier, D.L., et al., *The effects of malnutrition on child mortality in developing*  
445 *countries*. Bull World Health Organ, 1995. **73**(4): p. 443-8.
- 446 3. Rice, A.L., et al., *Malnutrition as an underlying cause of childhood deaths associated*  
447 *with infectious diseases in developing countries*. Bull World Health Organ, 2000. **78**(10):  
448 p. 1207-21.
- 449 4. Schroeder, D.G. and K.H. Brown, *Nutritional status as a predictor of child survival:*  
450 *summarizing the association and quantifying its global impact*. Bull World Health Organ,  
451 1994. **72**(4): p. 569-79.
- 452 5. Salzberg, N.T., et al., *Mortality Surveillance Methods to Identify and Characterize Deaths*  
453 *in Child Health and Mortality Prevention Surveillance Network Sites*. Clin Infect Dis,  
454 2019. **69**(Suppl 4): p. S262-s273.
- 455 6. Suchdev, P.S., et al., *Assessment of Neurodevelopment, Nutrition, and Inflammation*  
456 *From Fetal Life to Adolescence in Low-Resource Settings*. Pediatrics, 2017. **139**(Suppl  
457 1): p. S23-s37.
- 458 7. Cashin, K., Oot, L.,. *Guide to Anthropometry: A Practical Tool for Program Planners,*  
459 *Managers, and Implementers*. 2018; Available from:  
460 <https://www.fantaproject.org/tools/anthropometry-guide>.
- 461 8. Gupta, P.M., et al., *Improving assessment of child growth in a pediatric hospital setting*.  
462 BMC Pediatr, 2020. **20**(1): p. 419.
- 463 9. Wit, J.M., et al., *Practical Application of Linear Growth Measurements in Clinical*  
464 *Research in Low- and Middle-Income Countries*. Horm Res Paediatr, 2017. **88**(1): p. 79-  
465 90.
- 466 10. Conkle, J., et al., *Improving the quality of child anthropometry: Manual anthropometry in*  
467 *the Body Imaging for Nutritional Assessment Study (BINA)*. PLoS One, 2017. **12**(12): p.  
468 e0189332.
- 469 11. Mwangome M, B.J., *Measuring infants aged below 6 months: experience from the field*.  
470 Field Exchange, 2014(47).
- 471 12. Bilukha, O., et al., *Comparison of anthropometric data quality in children aged 6-23 and*  
472 *24-59 months: lessons from population-representative surveys from humanitarian*  
473 *settings*. BMC Nutrition, 2020. **6**(1).
- 474 13. Sachdeva, S., et al., *Mid-upper arm circumference v. weight-for-height Z-score for*  
475 *predicting mortality in hospitalized children under 5 years of age*. Public Health Nutr,  
476 2016. **19**(14): p. 2513-20.
- 477 14. McCormack, C.A., et al., *Reliability of body size measurements obtained at autopsy:*  
478 *impact on the pathologic assessment of the heart*. Forensic Sci Med Pathol, 2016. **12**(2):  
479 p. 139-45.
- 480 15. Raghunathan, P.L., S.A. Madhi, and R.F. Breiman, *Illuminating Child Mortality:*  
481 *Discovering Why Children Die*. Clin Infect Dis, 2019. **69**(Suppl 4): p. S257-s259.
- 482 16. Blau, D.M., et al., *Overview and Development of the Child Health and Mortality*  
483 *Prevention Surveillance Determination of Cause of Death (DeCoDe) Process and*  
484 *DeCoDe Diagnosis Standards*. Clin Infect Dis, 2019. **69**(Suppl 4): p. S333-s341.
- 485 17. Mehta, A., *Abstract: Prevalence of undernutrition among children 1-59 months in the*  
486 *Child Health and Mortality Prevention Surveillance (CHAMPS) Network*, in *The 22nd*  
487 *International Union of Nutritional Sciences (IUNS)-International Congress of Nutrition*  
488 *(ICN)*. 2022: Tokyo, Japan.
- 489 18. Perumal, N., et al., *Anthropometric data quality assessment in multisurvey studies of*  
490 *child growth*. Am J Clin Nutr, 2020. **112**(Suppl 2): p. 806s-815s.

- 491 19. Corsi, D.J., J.M. Perkins, and S.V. Subramanian, *Child anthropometry data quality from*  
492 *Demographic and Health Surveys, Multiple Indicator Cluster Surveys, and National*  
493 *Nutrition Surveys in the West Central Africa region: are we comparing apples and*  
494 *oranges?* Glob Health Action, 2017. **10**(1): p. 1328185.
- 495 20. Prudhon, C., et al., *An algorithm to assess methodological quality of nutrition and*  
496 *mortality cross-sectional surveys: development and application to surveys conducted in*  
497 *Darfur, Sudan.* Popul Health Metr, 2011. **9**(1): p. 57.
- 498 21. Rakislova, N., et al., *Standardization of Minimally Invasive Tissue Sampling Specimen*  
499 *Collection and Pathology Training for the Child Health and Mortality Prevention*  
500 *Surveillance Network.* Clinical Infectious Diseases, 2019. **69**(Supplement\_4): p. S302-  
501 S310.
- 502 22. Centers for Disease Control and Prevention, W.H.O., Nutrition International, UNICEF.,  
503 *Micronutrient survey manual.* 2020; Licence: CC BY-NC SA 3.0 IGO:[Available from:  
504 <https://mnsurvey.nutritionintl.org/>.
- 505 23. Jefferds, M.E.D., et al., *Acceptability and Experiences with the Use of 3D Scans to*  
506 *Measure Anthropometry of Young Children in Surveys and Surveillance Systems from*  
507 *the Perspective of Field Teams and Caregivers.* Current Developments in Nutrition,  
508 2022. **6**(6).
- 509 24. Bougma, K., et al., *Accuracy of a handheld 3D imaging system for child anthropometric*  
510 *measurements in population-based household surveys and surveillance platforms: an*  
511 *effectiveness validation study in Guatemala, Kenya, and China.* The American Journal of  
512 Clinical Nutrition, 2022. **116**(1): p. 97-110.
- 513 25. Oliveira, T., et al., *Technical error of measurement in anthropometry (English version).*  
514 Revista Brasileira de Medicina do Esporte, 2005. **11**: p. 81-85.
- 515 26. SMART Action Against Hunger—Canada and Technical Advisory Group, *The SMART*  
516 *Plausibility Check for Anthropometry.* 2015.
- 517 27. Conkle, J., et al., *Improving the quality of child anthropometry: Manual anthropometry in*  
518 *the Body Imaging for Nutritional Assessment Study (BINA).* PloS one, 2017. **12**(12): p.  
519 e0189332-e0189332.
- 520 28. Mei, Z. and L.M. Grummer-Strawn, *Standard deviation of anthropometric Z-scores as a*  
521 *data quality assessment tool using the 2006 WHO growth standards: a cross country*  
522 *analysis.* Bull World Health Organ, 2007. **85**(6): p. 441-8.
- 523 29. Dirk Schumacher, *anthro: Computation of the WHO Child Growth Standards.* 2021.
- 524 30. RStudioTeam., *RStudio: Integrated Development Environment for R.* RStudio, PBC.,  
525 2022: Boston, MA URL.
- 526 31. *WHO Child Growth Standards based on length/height, weight and age.* Acta Paediatr  
527 Suppl, 2006. **450**: p. 76-85.
- 528 32. Mei, Z. and L.M. Grummer-Strawn, *Standard deviation of anthropometric Z-scores as a*  
529 *data quality assessment tool using the 2006 WHO growth standards: a cross country*  
530 *analysis.* Bulletin of the World Health Organization, 2007. **85**(6): p. 441-448.
- 531 33. Papageorghiou, A.T., et al., *The INTERGROWTH-21(st) fetal growth standards: toward*  
532 *the global integration of pregnancy and pediatric care.* Am J Obstet Gynecol, 2018.  
533 **218**(2s): p. S630-s640.
- 534 34. Ulijaszek, S.J. and D.A. Kerr, *Anthropometric measurement error and the assessment of*  
535 *nutritional status.* Br J Nutr, 1999. **82**(3): p. 165-77.
- 536
- 537

538 TABLES  
539

**Table 1.** Sample characteristics among pre- and post-intervention groups, [CHAMPS Study, Manyatta, Kenya, October 2018 to September 2019](#)

|                                               | Pre-intervention,<br>n=75 | Post-intervention,<br>n=76 | p-value <sup>4</sup> |
|-----------------------------------------------|---------------------------|----------------------------|----------------------|
| <b>Age category, n (%)</b>                    |                           |                            |                      |
| <1 day                                        | 15 (20.0)                 | 21 (27.6)                  | 0.4821               |
| 1 day – 5 months                              | 28 (37.3)                 | 20 (26.3)                  |                      |
| 6 – 23 months                                 | 23 (30.7)                 | 25 (32.89)                 |                      |
| 24 – 59 months                                | 9 (12.0)                  | 10 (13.1)                  |                      |
| <b>Sex, n (%)</b>                             |                           |                            |                      |
| Female                                        | 31 (41.3)                 | 35 (46.1)                  | 0.5589               |
| <b>Anthropometric measurements, mean (SD)</b> |                           |                            |                      |
| Weight, kg                                    | 5.0 (3.8)                 | 4.8 (3.5)                  | 0.7543               |
| Length, cm                                    | 62.0 (18.0)               | 60.0 (17.6)                | 0.4899               |
| Head circumference (HC), cm                   | 39.0 (6.9)                | 37.9 (7.4)                 | 0.3509               |
| Mid-Upper Arm Circumference (MUAC), cm        | 11.0 (3.0)                | 10.2 (3.0)                 | 0.1064               |
| <b>Nutritional status, n (%)</b>              |                           |                            |                      |
| Stunting (LAZ <sup>1</sup> <-2SD)             | 24 (32.0)                 | 38 (50.0)                  | 0.0246               |
| Wasting (WLZ <sup>2</sup> <-2SD)              | 58 (77.3)                 | 54 (71.2)                  | 0.3780               |
| Underweight (WAZ <sup>3</sup> <-2)            | 40 (53.3)                 | 50 (65.8)                  | 0.1188               |

<sup>1</sup> LAZ: Length-for-age z-score

<sup>2</sup> WLZ: Length-for-weight z-score

<sup>3</sup> WAZ: Weight-for-age z-score

<sup>4</sup> p-values calculated using Chi Sq tests ([age, sex, nutritional status](#)) or t-tests ([anthropometric measurements](#))

540  
541

**Table 2.** Manual Anthropometry Digit preference scores<sup>1</sup> pre- and post-intervention, CHAMPS Study, Manyatta, Kenya, October 2018 to September 2019

|                                           | Pre- intervention, (N=75) |           |           |           | Post- intervention, (N=76) |           |           |           |
|-------------------------------------------|---------------------------|-----------|-----------|-----------|----------------------------|-----------|-----------|-----------|
|                                           | n(%)                      |           |           |           | n(%)                       |           |           |           |
|                                           | Length                    | Weight    | HC        | MUAC      | Length                     | Weight    | HC        | MUAC      |
| <b>0.0</b>                                | 65 (86.7)                 | 15 (20.0) | 57 (77.3) | 54 (72.0) | 3 (4.0)                    | 10 (13.2) | 5 (6.6)   | 2 (2.6)   |
| <b>0.1</b>                                | -                         | 2 (2.7)   | -         | -         | 12 (15.6)                  | 8 (10.5)  | 11 (14.5) | 18 (23.7) |
| <b>0.2</b>                                | -                         | 6 (8.0)   | -         | -         | 7 (9.2)                    | 9 (11.8)  | 9 (11.8)  | 10 (13.2) |
| <b>0.3</b>                                | -                         | 9 (12.0)  | -         | -         | 13 (17.1)                  | 4 (5.3)   | 3 (3.9)   | 9 (11.8)  |
| <b>0.4</b>                                | -                         | 6 (8.0)   | -         | -         | 5 (6.6)                    | 9 (11.8)  | 9 (11.8)  | 5 (6.6)   |
| <b>0.5</b>                                | 10 (13.3)                 | 6 (8.0)   | 17 (22.7) | 21 (28.0) | 6 (7.9)                    | 9 (11.8)  | 8 (10.5)  | 9 (11.8)  |
| <b>0.6</b>                                | -                         | 11 (14.7) | -         | -         | 7 (9.2)                    | 10 (13.2) | 13 (17.1) | 5 (6.6)   |
| <b>0.7</b>                                | -                         | 9 (12.0)  | -         | -         | 8 (10.5)                   | 4 (5.3)   | 1 (1.3)   | 5 (6.6)   |
| <b>0.8</b>                                | -                         | 5 (6.7)   | -         | -         | 8 (10.5)                   | 6 (7.9)   | 12 (15.8) | 8 (10.5)  |
| <b>0.9</b>                                | -                         | 6 (8.0)   | -         | -         | 7 (9.2)                    | 7 (9.2)   | 5 (6.6)   | 5 (6.6)   |
| <b>Digit preference score<sup>1</sup></b> | 86.2                      | 15.3      | 78.1      | 74.3      | 10.4                       | 9.5       | 16.6      | 18.4      |

<sup>1</sup> Digit preference scores (DPS) computed using Mark Myatt and Ernest Guevarra (2022).

<sup>2</sup> nipnTK: National Information Platforms for Nutrition Anthropometric Data Toolkit. <https://nutriverse.io/nipnTK/>, <https://github.com/nutriverse/nipnTK>

DPS<20 is acceptable; ≥20 indicates digit preference is problematic

542

543

**Table 3.** Means and standard deviations for [manual](#) anthropometric indices, [CHAMPS Study](#), Manyatta, Kenya, [October 2018 to September 2019](#)

|                                | Pre-training, (N=75) |            | Post-training, (N=76) |            | P-value <sup>1</sup> | Expected SD for high data quality [28] |
|--------------------------------|----------------------|------------|-----------------------|------------|----------------------|----------------------------------------|
|                                | n                    | Mean (SD)  | n                     | Mean (SD)  |                      |                                        |
| <b>LAZ<sup>2</sup> overall</b> | 75                   | -1.1 (2.6) | 76                    | -2.5 (2.9) | 0.0018               | <b>1.1 – 1.3</b>                       |
| < 1 months                     | 35                   | -0.8 (2.8) | 31                    | -3.0 (3.2) |                      |                                        |
| 1-59 months                    | 40                   | -1.4 (2.3) | 45                    | -2.2 (2.7) |                      |                                        |
| <b>WAZ<sup>3</sup> overall</b> | 75                   | -2.6 (2.3) | 76                    | -3.2 (2.4) | 0.0962               | <b>1.0 – 1.2</b>                       |
| < 1 months                     | 35                   | -2.0 (2.2) | 31                    | -2.9 (2.2) |                      |                                        |
| 1-59 m months                  | 40                   | -3.1 (2.3) | 45                    | -3.5 (2.5) |                      |                                        |
| <b>WLZ<sup>4</sup> overall</b> | 66                   | -3.1 (1.8) | 59                    | -2.9 (2.2) | 0.4777               | <b>0.85 – 1.1</b>                      |
| < 1 months                     | 28                   | -2.6 (1.1) | 15                    | -1.5 (1.3) |                      |                                        |
| 1-59 months                    | 38                   | -3.5 (2.1) | 44                    | -3.3 (2.3) |                      |                                        |

<sup>1</sup> p-values comparing overall pre- and post-training mean z-scores calculated using t-tests

<sup>2</sup> LAZ: Length-for-age z-score

<sup>3</sup> WLZ: Length-for-weight z-score

<sup>4</sup> WAZ: Weight-for-age z-score

**Table 4.** [Manual anthropometry](#) Technical errors of measurement for post-intervention measures, CHAMPS Study, Manyatta, Kenya, [October 2018 to September 2019](#)

|                                   | Length (cm) | Weight (kg) | Mid-Upper Arm Circumference (cm) | Head Circumference (cm) |
|-----------------------------------|-------------|-------------|----------------------------------|-------------------------|
| TEM <sup>A</sup>                  | 0.32        | 0.01        | 0.13                             | 0.18                    |
| Acceptable TEM <sup>[34]</sup>    | 0.35        | 0.17        | 0.26                             | -                       |
| VAV                               | 60.00       | 4.84        | 10.22                            | 37.88                   |
| Relative TEM (% TEM) <sup>C</sup> | 0.53%       | 0.29%       | 1.24%                            | 0.48%                   |

The technical error of measurement (TEM) is defined as the standard deviation of differences between repeated measures in the unit of the measurement, using the following equation

$$^A \text{ Equation 1: absolute technical errors of measurement (TEM) } = \sqrt{\frac{\sum d_i^2}{2n}}$$

Where:

$\sum d_i^2$  = Squared summation of deviations, n = number of individuals measured, and i = number of deviations

$$^C \text{ Equation 2: relative TEM } = 100 \times \frac{TEM}{VAV}$$

Where TEM = technical error of measurement expressed as %, VAV= variable average value, the relative TEM (%TEM), and the coefficient of reliability (R) were the statistical tests used to assess intra- and inter-observer reliability. The TEM was defined as the standard deviation of differences between repeated measures in the unit of the measurement (e.g., TEM for height measured in centimeters is cm), using the following equation:

Skillful anthropometrists relative technical errors of measurement (%TEM) cutoff  $\leq 1.5\%$  [25]

549  
550  
551

**FIGURES**

**Figure 1.** Bland Altman Plots for Length, Arm Circumference, and Head Circumference [comparing manual anthropometry and 3D imaging, CHAMPS Study, Manyatta, Kenya, October 2018 to September 2019](#)

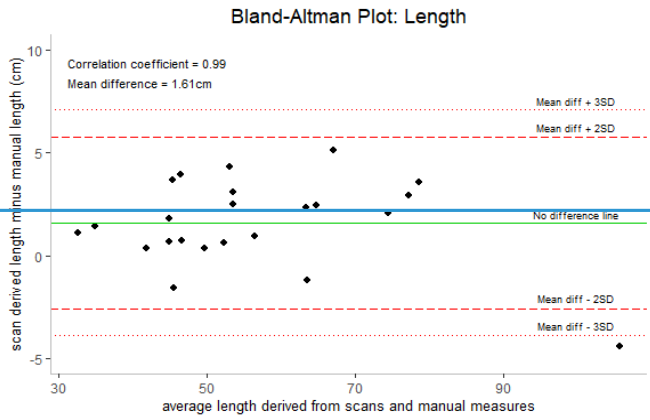

552

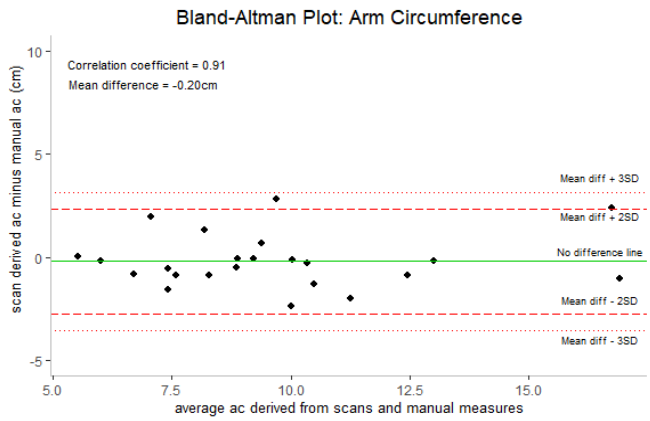

553

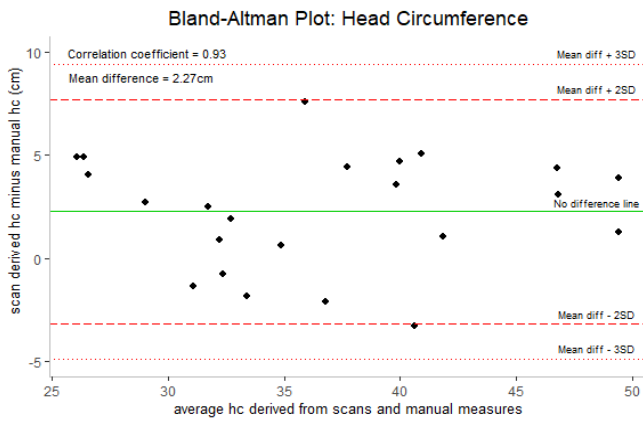

554

555 **Y-axis:** the difference between the scans and the manual measurements by the average of the  
 556 two methods

557 **X-axis:** the average of the scan and manual measures.

558

559 **Dotted lines:** represent the mean difference  $\pm$  3 standard deviations

560 **Dashed lines:** represent the mean difference  $\pm$  2 SD.

561 **Solid line:** across the plot is the no difference line.

562

563 Black points on the chart represent the 23 cases for which we had viable 3D scan data.

564 Spearman correlation coefficients were examined to measure the strength of the relationship  
 565 between scans and manual measures.

566

567 AC: Arm Circumference, HC: Head Circumference

Formatted: Font: 12 pt



## Response to Reviewers: PONE-D-23-01635

Thank you for the thoughtful and detailed review of our manuscript. We have carefully revised and responded to each point raised by the academic editor and reviewers noted below in red font. We have also submitted a revised manuscript in track changes, as well as an unmarked revised manuscript.

### Editor comments

1. Please ensure that your manuscript meets PLOS ONE's style requirements, including those for file naming. The PLOS ONE style templates can be found at

[https://journals.plos.org/plosone/s/file?id=wjVg/PLOSONe\\_formatting\\_sample\\_main\\_body.pdf](https://journals.plos.org/plosone/s/file?id=wjVg/PLOSONe_formatting_sample_main_body.pdf) and [https://journals.plos.org/plosone/s/file?id=ba62/PLOSONe\\_formatting\\_sample\\_title\\_authors\\_affiliations.pdf](https://journals.plos.org/plosone/s/file?id=ba62/PLOSONe_formatting_sample_title_authors_affiliations.pdf)

- Thanks we have made the required style changes including resubmitted the figure as a tiff file.

2. Please include a complete copy of PLOS' questionnaire on inclusivity in global research in your revised manuscript. Our policy for research in this area aims to improve transparency in the reporting of research performed outside of researchers' own country or community. The policy applies to researchers who have travelled to a different country to conduct research, research with Indigenous populations or their lands, and research on cultural artefacts. The questionnaire can also be requested at the journal's discretion for any other submissions, even if these conditions are not met.

Please find more information on the policy and a link to download a blank copy of the questionnaire here: <https://journals.plos.org/plosone/s/best-practices-in-research-reporting>.

Please upload a completed version of your questionnaire as Supporting Information when you resubmit your manuscript.

- Thanks we have completed and questionnaire and uploaded it as supporting information. We have also referred to the checklist in our Methods section

3. Please provide additional details regarding participant consent. In the ethics statement in the Methods and online submission information, please ensure that you have specified (1) whether consent was informed and (2) what type you obtained (for instance, written or verbal, and if verbal, how it was documented and witnessed). If your study included minors, state whether you obtained consent from parents or guardians. If the need for consent was waived by the ethics committee, please include this information.

If you are reporting a retrospective study of medical records or archived samples, please ensure that you have discussed whether all data were fully anonymized before you accessed them and/or whether the IRB or ethics committee waived the requirement for informed consent. If patients provided informed written consent to have data from their medical records used in research, please include this information.

- We have added 2 sentences in the Methods section describing both consent and study ethical clearance.

4. Thank you for stating the following in the Competing Interests section:

"I have read the journal's policy and the authors of this manuscript have the following competing interests: Eugene Alexander holds an ownership position in Body Surface Translations and therefore has a financial interest in the success of the 3D testing device described in this study. Data were blinded and not shared with Mr. Alexander until completion of draft manuscript.

Additional disclosure: The findings and conclusions in this report are those of the authors and do not necessarily represent the official position of the Centers for Disease Control and Prevention."

Please confirm that this does not alter your adherence to all PLOS ONE policies on sharing data and materials, by including the following statement: ""This does not alter our adherence to PLOS ONE policies on sharing data and materials." (as detailed online in our guide for authors <http://journals.plos.org/plosone/s/competing-interests>).

If there are restrictions on sharing of data and/or materials, please state these. Please note that we cannot proceed with consideration of your article until this information has been declared.

Please include your updated Competing Interests statement in your cover letter; we will change the online submission form on your behalf.

- Thanks, we have updated our competing interests statement to include "This does not alter our adherence to PLOS ONE policies on sharing data and materials."

5. We note that you have indicated that data from this study are available upon request. PLOS only allows data to be available upon request if there are legal or ethical restrictions on sharing data publicly. For more information on unacceptable data access restrictions, please see <http://journals.plos.org/plosone/s/data-availability#loc-unacceptable-data-access-restrictions>.

In your revised cover letter, please address the following prompts:

a) If there are ethical or legal restrictions on sharing a de-identified data set, please explain them in detail (e.g., data contain potentially sensitive information, data are owned by a third-party organization, etc.) and who has imposed them (e.g., an ethics committee). Please also provide contact information for a data access committee, ethics committee, or other institutional body to which data requests may be sent.

b) If there are no restrictions, please upload the minimal anonymized data set necessary to replicate your study findings as either Supporting Information files or to a stable, public repository and provide us with the relevant URLs, DOIs, or accession numbers. For a list of acceptable repositories, please see <http://journals.plos.org/plosone/s/data-availability#loc-recommended-repositories>.

We will update your Data Availability statement on your behalf to reflect the information you provide.

- We have decided to share an anonymized dataset as Supporting Information files

6. We note that you have stated that you will provide repository information for your data at acceptance. Should your manuscript be accepted for publication, we will hold it until you provide the relevant accession numbers or DOIs necessary to access your data. If you wish to make changes to your Data Availability statement, please describe these changes in your cover letter and we will update your Data Availability statement to reflect the information you provide.

-As noted above, we have included our analysis datasets as a Supporting information file.

7. We note that you have included the phrase “data not shown” in your manuscript. Unfortunately, this does not meet our data sharing requirements. PLOS does not permit references to inaccessible data. We require that authors provide all relevant data within the paper, Supporting Information files, or in an acceptable, public repository. Please add a citation to support this phrase or upload the data that corresponds with these findings to a stable repository (such as Figshare or Dryad) and provide and URLs, DOIs, or accession numbers that may be used to access these data. Or, if the data are not a core part of the research being presented in your study, we ask that you remove the phrase that refers to these data.

- We have removed these statements as the data used are being shared as supporting information files

8. Please include a separate caption for figure in your manuscript.

- Done

#### Reviewers' comments:

Reviewer #1: The study is a very interesting study that will provide information on how the errors in manual anthropometry can be improved in a post-mortem setting. Information claimed to be evaluated in the study will be very vital in nutrition assessment of children in post-mortem settings. However, the following observations were made during review:

1. The title of the article seem not to be appropriate. Suggested title is presented in the comment section.

- Thanks for this feedback. Based on your and reviewer #2's feedback, we have changed titled to “Impact of anthropometry training and feasibility of 3D imaging on anthropometry data quality among children under five years in a postmortem setting”

2. comments on the abstract, introduction and materials and methods, and results were made in the manuscript.

- Thank you for your suggestions. We have made all the suggested changes to the abstract, introduction, and methods sections.

3. Generally, authors seem not to define the objectives of the study properly and this is reflecting in the methodology, and result sections.

- We apologize for the confusion. We have tried to clearly define the objectives in the last paragraph of the introduction with both primary and secondary objectives. The methods and results section follow this same flow (e.g., presenting results of standard anthropometry data quality first, followed by study on 3D imaging)

4. Authors should interpret what is on the table correctly in the result section.

- We have reviewed and double-checked that all results in the table match their descriptions in the text.

5. The authors need to state the objectives of the study clearly and present results based on these objectives.

- please see response #3

6. Statistical analysis carried out was not clearly stated in the methodology. It is not appropriate to have to look at the table before having an idea of the statistics carried out.

- We have added a description of the statistical analyses conducted in the methods section

7. Figures indicated on the manuscript were not seen.

- We apologize- the figure was uploaded as a word document. It has now been resubmitted using the required tiff format

8. In the methodology, authors claimed to do a survey to collect information on whether the participants believed training on manual anthropometry improved the accuracy of the measurements, whether 3D imaging reduced the time to measure, and asked about the participants preference in measuring using manual anthropometry or the 3D imaging technology. In addition, authors also claimed to conducted a 60-minute in-depth interview with the single lead site technician to collect qualitative feedback on the team's experience with performing manual anthropometry and ease of using the 3D imaging software. The results for these survey and qualitative study are not clear in the result sections as well as the tables.

Results were presented not indicating whether it is for manual anthropometry or 3D imaging (Tables 1-4). Although, I suppose that is for manual anthropometry. The results for pre- and post-training for the 3D scan were never presented and figure 1 was comparing manual anthropometry with 3 D imaging (although the figures were not seen).

Results on qualitative feedbacks were only presented for 3D imaging and not manual anthropometry.

- Thank you for this feedback. We have attempted to make the Methods and results section more clear. We have clarified table titles to indicate manual anthropometry, and have also changed the Figure title to clarify. We have also added additional text in the qualitative results section (lines 301-305).

9. Results on whether participants believed training on manual anthropometry improved the accuracy of the measurement or 3D imaging reduced the time to measure were not presented at all. Also,

participants preference in measuring using manual anthropometry or 3D imaging technology was not presented in the result section.

- Thank you for raising this issue. We inadvertently excluded results from the post-training survey and have now added this to the “Qualitative findings” section of the results section (lines 300-305).

10. Discussion section needs to be re-written to reflect exactly what is in the results. In addition, results need to be properly discussed in line with findings from previous studies and implications should be discussed clearly and appropriately. Assumptions in the result sections is not appropriate.

- Thanks for your comment. We have attempted to re-write sections of the Discussion section to improve clarity and insure that findings are consistent to what were reported in the Results.

11. Authors did not have conclusion section at all.

- The last paragraph was our conclusions, which has now been appropriately labeled. The wording of the Conclusion has also been updated.

12. There is need for proper organization of the content of the manuscripts for coherence.

- Thank you for your comment. We have added several new headers and text to improve the organization and flow of the manuscript

13. Some sentences seem complicated and difficult to understand. The authors are advised to seek for professional English editing service to check the revised manuscript for grammar, syntax and style errors.

- Thanks for your comment. We have made appropriate grammatical and style edits to improve clarity.

Reviewer #2: PONE-D-23-01635

This is an important topic because the findings add to the existing evidence on causes of death due to anthropometric deficits in children. This study is novel and a useful contribution to the body of evidence on child health and nutrition. The paper fits the PlosOne journal’s aim and will be interesting to your readership.

The analysis is comprehensive and accurate. Limitations and strengths of the analysis have been declared adequately. Data analysis and results were adequately done and well presented. This paper deserves to be published.

Please, find below suggested minor comments and suggestions for your consideration to further improve your manuscript:

Comments:

Title

1. The current title of the article should be modified to reflect manual anthropometry as well as 3D imaging and the target or study population - children under 5 years.

- Thank you for your feedback. We have changed title to “Impact of anthropometry training and feasibility of 3D imaging on anthropometry data quality among children under five years in a postmortem setting”

#### Abstract

1. Please, could the conclusion “Future research on the appropriate use of current growth standards to define malnutrition in this severely ill population is needed” be revised to reflect the topic of interest. .... This severely ill population is not very clear, I thought the study setting was post-mortem.

- Thank you. We have modified the conclusion in the abstract and removed the sentence on use of growth standards, as this requires additional explanation in the Discussion section of the manuscript.

#### Method

1. In paragraph 3 .... weight, and circumference measurements using two.... please could indicate which circumference measurement you are referring to?

- Thank you for your feedback. We have updated the text in line 162 to reflect that head and mid-upper arm circumference are the two circumference measurements.

2. Please revise the sentence in paragraph 3 .... ‘Following the training, two unique site staff each performed manual anthropometry on 76 new cases, for a total of 2 manual measures per case’ and make it simpler and clearer.

- Thank you for the feedback. We revised lines 174-154 to say “Following the training, two trained anthropometrists manually collected anthropometric measurements for 76 cases, with two separate measurements collected per case by different anthropometrists”.

3. Authors should check if the sentence in paragraph 3 “Following data collection, it was found that the software... settings had been inadvertently altered on the scanner resulting in viable scan data on only 23 cases.” is communicating the right message, because if the software was inadvertently altered then it could me the data was not viable. I may be wrong. If that was true, then how did it impact on the findings?

-Thank you for the feedback. We revised lines 177-178 to say “During data processing, after the completion of data collection, it was identified that the AutoAnthro software settings had been inadvertently altered for a significant number of cases, resulting in a final sample size of 23 cases”.

4. Clarity needed what actually happened? .....‘Manual anthropometry was to be performed prior to the start of the diagnostic autopsy. Significant challenges arose during data collection which resulted in a limited sample size of 3 cases; thus, our results will focus on the Kenya site’.

- Thank you for the feedback. We have clarified line 230 to say “Significant challenges arose during data collection, including identification of eligible cases and availability to conduct manual anthropometry before the start of the diagnostic autopsy. Despite best efforts to coordinate between the study team and CHAO team, the study resulted in a limited sample size of 3 cases; thus, our results will focus on the Kenya site.

5. What was the duration of the training? What was the duration of the data collection?

-The Kenya site training took place in April 2019 followed by data collection from April-September 2019. The training for the CHOA study took place in September 2019 with data collection in October-November 2019.

6. Please indicate how you analysed the qualitative data, and how you utilized the data.

-Thank you for the feedback. We added information on the statistical analysis of the qualitative data and how we utilized the qualitative data in lines 219-223.

## Results

1. 'There was a substantial loss in sample size when examining WLZ using WHO growth standards with 12% data loss in the pre- and 22% loss in the post-training group'.

How was LAZ also affected given that there was data lost for WLZ?

- Thanks for this question. When using the WHO growth standards, the absolute limit of 45cm in length only applies to the calculation of WLZ, not LAZ since LAZ is estimable because it is based on standardizing child length according to their completed age (and by sex). 45cm was determined by WHO as the minimum birth length for healthy children (e.g., without any intrauterine growth restriction and or congenital disorder of size).

2. Why will authors talk about results that are not available?

'While there were challenges in securing data at the CHOA site, findings were complementary to those in the Kenya site (data not shown)'.

- In response to earlier comment by editor, we have deleted the statement "data not shown" and have shared datasets as supporting files.

## Discussion

1. Authors, please explain why rigor mortis will not impede manual anthropometry measurements, this is because the qualitative findings show that it could be a challenge to get accurate measurements.

- Thanks for this comment. We have edited the qualitative findings in the results to make this more clear. While there were challenges in taking manual anthropometric measurements due to rigor mortis, the stiffening was always accounted for with added pressure and time. Thus, the accuracy of measurements was ensured using the wooden length boards.

2. Table 3 in the results section and Paragraph 3 in the discussion have some repetitions, this happened because you cited literature in your results section. Authors should consider to present only results under the results section.

-Thank you for the feedback. We removed the duplicated information from Table 3 in the results section.

3. Check WHO-GS should be written as WHO-MGRS.

-Thanks for this comment. We have written out WHO growth standards and WHO Multicentre Growth Reference Study when appropriate.

4. 'Future research on the appropriate use of standards to define malnutrition among severely ill populations will elucidate our understanding of the role of malnutrition in U5M and inform future malnutrition-specific U5M reduction interventions' I think I know what you are trying to say but I am wandering if this appropriate recommendation because you did not work with severely sick children. Please consider to revise your recommendation.

- Thanks for this comment. We have revised our concluding statement.

General comments

1. Please number the lines for the sentences in your manuscript. It helps reviewers to give feedback easily.

- Line numbers have been added
